# Supplementary material for: Cu-catalyzed β-functionalization of saturated ketones with indoles: a one-step synthesis of C3-substituted indoles
Source: Royal Society of Chemistry journal article supplement (doi:10.1039/c6ra19000f), 2016-01-01

Supporting information  
for

**Cu-Catalyzed  $\beta$ -functionalization of saturated ketones  
with indoles: A One-Step Synthesis of C3-substituted  
indoles**

Zhao Yang,<sup>a</sup> Chengkou Liu,<sup>b</sup> Yu Zeng,<sup>b</sup> Jingming Zhang,<sup>b</sup> Zhixiang Wang,<sup>a</sup> Zheng Fang\*,<sup>b</sup> and Kai Guo\*,<sup>b, c</sup>

<sup>a</sup>College of Engineering China Pharmaceutical University, 24 Tongjiiaxiang, NanJing, 210003, China

<sup>b</sup>College of Biotechnology and Pharmaceutical Engineering Nanjing Tech University 30 Puzhu South Road, Nanjing, 211816, China

<sup>c</sup>State Key Laboratory of Materials-Oriented Chemical Engineering Nanjing Tech University, 30 Puzhu South Road, Nanjing, 211816, China

|     |                                                                          |         |
|-----|--------------------------------------------------------------------------|---------|
| I   | General experimental information                                         | S2      |
| II  | Table S1: the solvent screening                                          | S3      |
| III | Table S2: the temperature screening                                      | S3      |
| IV  | Experimental details for the synthesis of alkylated indole derivatives   | S4-S13  |
| V   | Analytical data for compounds <b>3</b>                                   | S14-S21 |
| VI  | <sup>1</sup> H NMR and <sup>13</sup> C NMR spectra of compounds <b>3</b> | S22-S45 |

## **I , General experimental information**

Reagents and solvents: Commercially available reagents were used without any further purification. All organic solvents were also of reagent grade quality without any further purification.

Chromatography: Flash column chromatography was performed using silicycle silica gel (200-300 mesh).

Analytical thin-layer chromatography (TLC) was performed on 0.2 mm coated silica gel plates (HSGF 254) and visualized using a UV lamp (254 nm or 365 nm).

Nuclear Magnetic Resonance Spectroscopy:

<sup>1</sup>H NMR was recorded on magnet system 400'54 ascend purchased from Bruker Biospin AG.

<sup>1</sup>H NMR spectra chemical shifts ( $\delta$ ) are reported in parts per million (ppm) referenced to TMS (0 ppm).

<sup>13</sup>C NMR spectra chemical shifts ( $\delta$ ) are reported in parts per million (ppm) were referenced to carbon resonances in the NMR solvent.

ESI-MS spectra were recorded on Agilent Q-TOF 6520.

## II, Table S1: the solvent screening

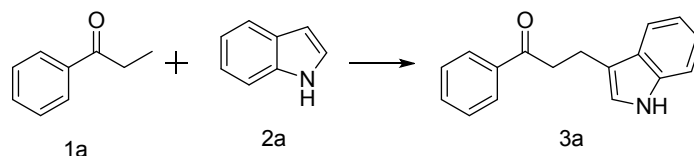

| entry | solvent          | t (h) | Yield (%) <sup>b</sup> |
|-------|------------------|-------|------------------------|
| 1     | DMSO             | 24    | 65                     |
| 2     | DMF              | 24    | 9                      |
| 3     | NMP              | 24    | trace                  |
| 4     | <i>p</i> -xylene | 12    | 86                     |

<sup>a</sup>Reaction condition: 1a (3 mmol), 2a (1 mmol), Cu(OAc)<sub>2</sub> (0.2 mmol), L2 (0.2 mmol) and TEMPO (1 mmol) in solvent (3 mL) were heated at 100 °C under Ar (Ar balloon). <sup>b</sup>Yield of isolated product.

## III, Table S2: the temperature screening

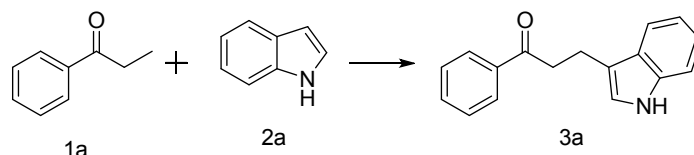

| entry | T (°C) | t (h) | Yield (%) <sup>b</sup> |
|-------|--------|-------|------------------------|
| 1     | 120    | 4     | 86                     |
| 2     | 110    | 6     | 84                     |
| 3     | 100    | 12    | 86                     |
| 4     | 90     | 24    | 65                     |
| 5     | 80     | 24    | Trace                  |

<sup>a</sup>Reaction condition: 1a (3 mmol), 2a (1 mmol), Cu(OAc)<sub>2</sub> (0.1 mmol), L2 (0.1 mmol) and TEMPO (1 mmol) in *p*-xylene (3 mL) were heated under Ar (Ar balloon). <sup>b</sup>Yield of isolated product.

## IV, Experimental details for the synthesis of alkylated indole derivatives

To a mixture of saturated ketones (3 mmol, 3 eq) and indoles (1 mmol, 1 eq) in *p*-xylene (3 mL) Cu(OAc)<sub>2</sub> (0.1 mmol, 0.1 eq), TMEDA (0.1 mmol, 0.1 eq) and TEMPO (1 mmol, 1 eq) were added and stirred at 120 °C under Ar atmosphere for 4-8 h. The progress of the reaction was monitored by TLC. After complete conversion, the mixture was cooled down to room temperature. Then, the reaction mixture was diluted with H<sub>2</sub>O (30 mL) and extracted by ethyl acetate (30 mL). The separated organic layers were dried over by anhydrous Na<sub>2</sub>SO<sub>4</sub> and filtered. The filtrate was concentrated under reduced pressure and the residue was chromatographed on silica gel using hexane/ethyl acetate to afford the desired product.

1,

3-(1*H*-indol-3-yl)-1-phenylpropan-1-one(3a)

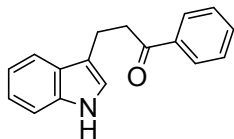

To a mixture of propiophenone (3 mmol, 402.5 mg) and indole (1 mmol, 117.2 mg) in pxylene (3 mL) Cu(OAc)<sub>2</sub> (0.1 mmol, 18.2mg), TMEDA (0.1 mmol, 11.6 mg) and TEMPO (1 mmol, 156.2 mg) were added and stirred at 120°C under Ar atmosphere for 5 h. The progress of the reaction was monitored by TLC. After complete conversion, the mixture was cooled down to room temperature. Then, the reaction mixture was diluted with H<sub>2</sub>O (30 mL) and extracted by ethyl acetate (30 mL). The separated organic layers were dried over by anhydrous Na<sub>2</sub>SO<sub>4</sub> and filtered. The filtrate was concentrated under reduced pressure and the residue was chromatographed on silica gel using hexane/ethyl acetate (10:1) to afford the desired product.

Orange solid (214.2 mg, 86%)

2,

3-(2-methyl-1*H*-indol-3-yl)-1-phenylpropan-1-one(3b)

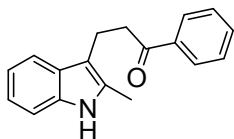

To a mixture of propiophenone (3 mmol, 402.5 mg) and 2-methylindole (1 mmol, 131.2 mg) in pxylene (3 mL) Cu(OAc)<sub>2</sub> (0.1 mmol, 18.2mg), TMEDA (0.1 mmol, 11.6 mg) and TEMPO (1 mmol, 156.2 mg) were added and stirred at 120°C under Ar atmosphere for 5 h. The progress of the reaction was monitored by TLC. After complete conversion, the mixture was cooled down to room temperature. Then, the reaction mixture was diluted with H<sub>2</sub>O (30 mL) and extracted by ethyl acetate (30 mL). The separated organic layers were dried over by anhydrous Na<sub>2</sub>SO<sub>4</sub> and filtered. The filtrate was concentrated under reduced pressure and the residue was chromatographed on silica gel using hexane/ethyl acetate (10:1) to afford the desired product.

White solid (228.9 mg, 87%)

3,

3-(4-methyl-1*H*-indol-3-yl)-1-phenylpropan-1-one(3c)

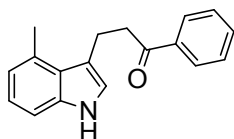

To a mixture of propiophenone (3 mmol, 402.5 mg) and 4-methylindole (1 mmol, 131.2 mg) in pxylene (3 mL) Cu(OAc)<sub>2</sub> (0.1 mmol, 18.2mg), TMEDA (0.1 mmol, 11.6 mg) and TEMPO (1 mmol, 156.2 mg) were added and stirred at 120°C under Ar atmosphere for 5 h. The progress of the reaction was monitored by TLC. After complete conversion, the mixture was cooled down to room temperature. Then, the reaction mixture was diluted with H<sub>2</sub>O (30 mL) and extracted by ethyl acetate (30 mL). The separated organic layers were dried over by anhydrous Na<sub>2</sub>SO<sub>4</sub> and filtered. The filtrate was concentrated under reduced pressure and the residue was chromatographed on silica gel using hexane/ethyl acetate (10:1) to afford the desired product.

Yellow solid (221.0 mg, 84%)

4,

3-(5-methyl-1*H*-indol-3-yl)-1-phenylpropan-1-one(3d)

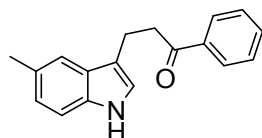

To a mixture of propiophenone (3 mmol, 402.5 mg) and 5-methylindole (1 mmol, 131.2 mg) in pxylene (3 mL) Cu(OAc)<sub>2</sub> (0.1 mmol, 18.2mg), TMEDA (0.1 mmol, 11.6 mg) and TEMPO (1 mmol, 156.2 mg) were added and stirred at 120°C under Ar atmosphere for 5 h. The progress of the reaction was monitored by TLC. After complete conversion, the mixture was cooled down to room temperature. Then, the reaction mixture was diluted with H<sub>2</sub>O (30 mL) and extracted by ethyl acetate (30 mL). The separated organic layers were dried over by anhydrous Na<sub>2</sub>SO<sub>4</sub> and filtered. The filtrate was concentrated under reduced pressure and the residue was chromatographed on silica gel using hexane/ethyl acetate (10:1) to afford the desired product.

Black solid (189.4 mg, 72%)

5,

3-(6-methyl-1*H*-indol-3-yl)-1-phenylpropan-1-one(3e)

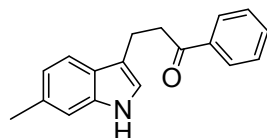

To a mixture of propiophenone (3 mmol, 402.5 mg) and 6-methylindole (1 mmol, 131.2 mg) in pxylene (3 mL) Cu(OAc)<sub>2</sub> (0.1 mmol, 18.2mg), TMEDA (0.1 mmol, 11.6 mg) and TEMPO (1 mmol, 156.2 mg) were added and stirred at 120°C under Ar atmosphere for 5 h. The progress of the reaction was monitored by TLC. After complete conversion, the mixture was cooled down to room temperature. Then, the reaction mixture was diluted with H<sub>2</sub>O (30 mL) and extracted by ethyl acetate (30 mL). The separated organic layers were dried over by anhydrous Na<sub>2</sub>SO<sub>4</sub> and filtered. The filtrate was concentrated under reduced pressure and the residue was chromatographed on silica gel using hexane/ethyl acetate (10:1) to afford

the desired product.

Pale red solid (223.7 mg, 85%)

6,

3-(7-methyl-1*H*-indol-3-yl)-1-phenylpropan-1-one(3f)

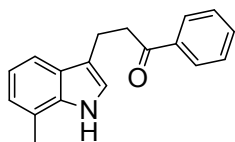

To a mixture of propiophenone (3 mmol, 402.5 mg) and 7-methylindole (1 mmol, 131.2 mg) in pxylene (3 mL) Cu(OAc)<sub>2</sub> (0.1 mmol, 18.2mg), TMEDA (0.1 mmol, 11.6 mg) and TEMPO (1 mmol, 156.2 mg) were added and stirred at 120°C under Ar atmosphere for 5 h. The progress of the reaction was monitored by TLC. After complete conversion, the mixture was cooled down to room temperature. Then, the reaction mixture was diluted with H<sub>2</sub>O (30 mL) and extracted by ethyl acetate (30 mL). The separated organic layers were dried over by anhydrous Na<sub>2</sub>SO<sub>4</sub> and filtered. The filtrate was concentrated under reduced pressure and the residue was chromatographed on silica gel using hexane/ethyl acetate (10:1) to afford the desired product.

White solid (218.4 mg, 83%)

7,

3-(1-methyl-1*H*-indol-3-yl)-1-phenylpropan-1-one(3g)

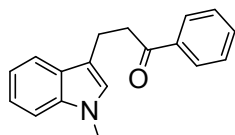

To a mixture of propiophenone (3 mmol, 402.5 mg) and 1-methylindole (1 mmol, 131.2 mg) in pxylene (3 mL) Cu(OAc)<sub>2</sub> (0.1 mmol, 18.2mg), TMEDA (0.1 mmol, 11.6 mg) and TEMPO (1 mmol, 156.2 mg) were added and stirred at 120°C under Ar atmosphere for 5 h. The progress of the reaction was monitored by TLC. After complete conversion, the mixture was cooled down to room temperature. Then, the reaction mixture was diluted with H<sub>2</sub>O (30 mL) and extracted by ethyl acetate (30 mL). The separated organic layers were dried over by anhydrous Na<sub>2</sub>SO<sub>4</sub> and filtered. The filtrate was concentrated under reduced pressure and the residue was chromatographed on silica gel using hexane/ethyl acetate (10:1) to afford the desired product.

Pale yellow oil (178.9 mg, 68%)

8,

3-(5-nitro-1*H*-indol-3-yl)-1-phenylpropan-1-one(3h)

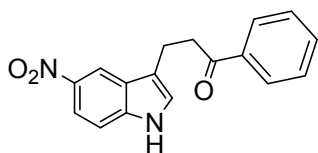

To a mixture of propiophenone (3 mmol, 402.5 mg) and 5-nitroindole (1 mmol, 162.2 mg) in pxylene (3 mL) Cu(OAc)<sub>2</sub> (0.1 mmol, 18.2mg), TMEDA (0.1 mmol, 11.6 mg) and TEMPO (1 mmol, 156.2 mg) were added and stirred at 120°C under Ar atmosphere for 8 h. The progress of the reaction was monitored by TLC. After complete conversion, the mixture was cooled down to room temperature. Then, the reaction mixture was diluted with H<sub>2</sub>O (30 mL) and extracted by ethyl acetate (30 mL). The separated organic layers were dried over by anhydrous Na<sub>2</sub>SO<sub>4</sub> and filtered. The filtrate was concentrated under reduced pressure and the residue was chromatographed on silica gel using hexane/ethyl acetate (7:1) to afford the desired product.

Yellow solid (241.2 mg, 82%)

9

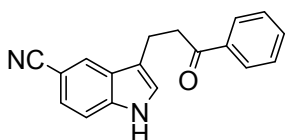

3-(5-cyano-1*H*-indol-3-yl)-1-phenylpropan-1-one(3i)

To a mixture of propiophenone (3 mmol, 402.5 mg) and 5-cyanoindole (1 mmol, 142.2 mg) in pxylene (3 mL) Cu(OAc)<sub>2</sub> (0.1 mmol, 18.2mg), TMEDA (0.1 mmol, 11.6 mg) and TEMPO (1 mmol, 156.2 mg) were added and stirred at 120°C under Ar atmosphere for 7 h. The progress of the reaction was monitored by TLC.

10,

3-(5-fluoro-1*H*-indol-3-yl)-1-phenylpropan-1-one(3j)

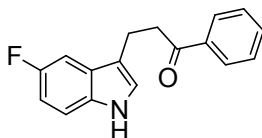

To a mixture of propiophenone (3 mmol, 402.5 mg) and 5-fluoroindole (1 mmol, 135.1 mg) in pxylene (3 mL) Cu(OAc)<sub>2</sub> (0.1 mmol, 18.2mg), TMEDA (0.1 mmol, 11.6 mg) and TEMPO (1 mmol, 156.2 mg) were added and stirred at 120°C under Ar atmosphere for 5 h. The progress of the reaction was monitored by TLC. After complete conversion, the mixture was cooled down to room temperature. Then, the reaction mixture was diluted with H<sub>2</sub>O (30 mL) and extracted by ethyl acetate (30 mL). The separated organic layers were dried over by anhydrous Na<sub>2</sub>SO<sub>4</sub> and filtered. The filtrate was concentrated under reduced pressure and the residue was chromatographed on silica gel using hexane/ethyl acetate (9:1) to afford the desired product.

Blue solid (213.7 mg, 80%)

11,

3-(5-chloro-1*H*-indol-3-yl)-1-phenylpropan-1-one(3k)

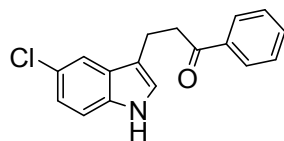

To a mixture of propiophenone (3 mmol, 402.5 mg) and 5-chloroindole (1 mmol, 151.6 mg) in pxylene (3 mL) Cu(OAc)<sub>2</sub> (0.1 mmol, 18.2mg), TMEDA (0.1 mmol, 11.6 mg) and TEMPO (1 mmol, 156.2 mg) were added and stirred at 120°C under Ar atmosphere for 5 h. The progress of the reaction was monitored by TLC. After complete conversion, the mixture was cooled down to room temperature. Then, the reaction mixture was diluted with H<sub>2</sub>O (30 mL) and extracted by ethyl acetate (30 mL). The separated organic layers were dried over by anhydrous Na<sub>2</sub>SO<sub>4</sub> and filtered. The filtrate was concentrated under reduced pressure and the residue was chromatographed on silica gel using hexane/ethyl acetate (9:1) to afford the desired product.

Pale purple solid (229.3 mg, 81%)

12,

3-(5-bromo-1*H*-indol-3-yl)-1-phenylpropan-1-one(3l)

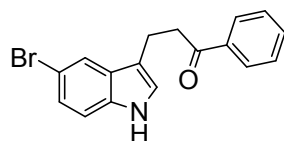

To a mixture of propiophenone (3 mmol, 402.5 mg) and 5-bromoindole (1 mmol, 196.4 mg) in pxylene (3 mL) Cu(OAc)<sub>2</sub> (0.1 mmol, 18.2mg), TMEDA (0.1 mmol, 11.6 mg) and TEMPO (1 mmol, 156.2 mg) were added and stirred at 120°C under Ar atmosphere for 5 h. The progress of the reaction was monitored by TLC. After complete conversion, the mixture was cooled down to room temperature. Then, the reaction mixture was diluted with H<sub>2</sub>O (30 mL) and extracted by ethyl acetate (30 mL). The separated organic layers were dried over by anhydrous Na<sub>2</sub>SO<sub>4</sub> and filtered. The filtrate was concentrated under reduced pressure and the residue was chromatographed on silica gel using hexane/ethyl acetate (9:1) to afford the desired product.

Blue solid (278.0 mg, 85%)

13,

3-(5-hydroxy-1*H*-indol-3-yl)-1-phenylpropan-1-one(3m)

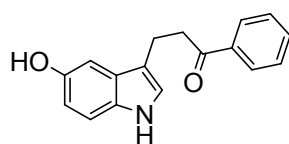

To a mixture of propiophenone (3 mmol, 402.5 mg) and 5-hydroxyindole (1 mmol, 133.2 mg) in pxylene (3 mL) Cu(OAc)<sub>2</sub> (0.1 mmol, 18.2mg), TMEDA (0.1 mmol, 11.6 mg) and TEMPO (1 mmol, 156.2 mg) were added and stirred at 120°C under Ar atmosphere for 4 h. The progress of the reaction was monitored by TLC. After complete conversion, the mixture was cooled down to room temperature. Then, the reaction mixture was diluted with H<sub>2</sub>O (30 mL) and extracted by ethyl acetate (30 mL). The separated organic layers were dried over by anhydrous Na<sub>2</sub>SO<sub>4</sub> and filtered. The filtrate was concentrated under reduced pressure and the residue was chromatographed on silica gel using hexane/ethyl acetate (7:1) to afford the desired product.

Pale yellow solid (172.3 mg, 65%)

14,

3-(5-methoxy-1*H*-indol-3-yl)-1-phenylpropan-1-one(3n)

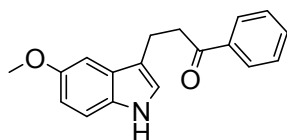

To a mixture of propiophenone (3 mmol, 402.5 mg) and 5-methoxyindole (1 mmol, 147.2 mg) in pxylene (3 mL) Cu(OAc)<sub>2</sub> (0.1 mmol, 18.2mg), TMEDA (0.1 mmol, 11.6 mg) and TEMPO (1 mmol, 156.2 mg) were added and stirred at 120°C under Ar atmosphere for 4 h. The progress of the reaction was monitored by TLC. After complete conversion, the mixture was cooled down to room temperature. Then, the reaction mixture was diluted with H<sub>2</sub>O (30 mL) and extracted by ethyl acetate (30 mL). The separated organic layers were dried over by anhydrous Na<sub>2</sub>SO<sub>4</sub> and filtered. The filtrate was concentrated under reduced pressure and the residue was chromatographed on silica gel using hexane/ethyl acetate (9:1) to afford the desired product.

Pale yellow solid (240.0 mg, 86%)

15,

3-(5-carboxy-1*H*-indol-3-yl)-1-phenylpropan-1-one(3o)

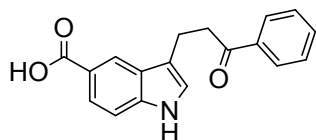

To a mixture of propiophenone (3 mmol, 402.5 mg) and indole-5-carboxylic acid (1 mmol, 161.2 mg) in pxylene/DMSO (3 mL, 1.5+1.5) Cu(OAc)<sub>2</sub> (0.1 mmol, 18.2mg), TMEDA (0.1 mmol, 11.6 mg) and TEMPO (1 mmol, 156.2 mg) were added and stirred at 120°C under Ar atmosphere for 8 h. The progress of the reaction was monitored by TLC. After complete conversion, the mixture was cooled down to room temperature. Then, the reaction mixture was diluted with H<sub>2</sub>O (30 mL) and extracted by ethyl acetate (30 mL). The separated organic layers were dried over by anhydrous Na<sub>2</sub>SO<sub>4</sub> and filtered. The filtrate was concentrated under reduced pressure and the residue was chromatographed on silica gel using

hexane/ethyl acetate (5:1) to afford the desired product.

Yellow solid (228.6 mg, 78%)

16,

3-(5-methoxycarbonyl-1*H*-indol-3-yl)-1-phenylpropan-1-one(3p)

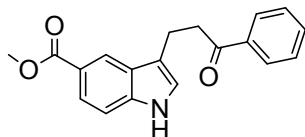

To a mixture of propiophenone (3 mmol, 402.5 mg) and methyl indole-5-carboxylate (1 mmol, 175.2 mg) in pxylene (3 mL) Cu(OAc)<sub>2</sub> (0.1 mmol, 18.2mg), TMEDA (0.1 mmol, 11.6 mg) and TEMPO (1 mmol, 156.2 mg) were added and stirred at 120 °C under Ar atmosphere for 6 h. The progress of the reaction was monitored by TLC. After complete conversion, the mixture was cooled down to room temperature. Then, the reaction mixture was diluted with H<sub>2</sub>O (30 mL) and extracted by ethyl acetate (30 mL). The separated organic layers were dried over by anhydrous Na<sub>2</sub>SO<sub>4</sub> and filtered. The filtrate was concentrated under reduced pressure and the residue was chromatographed on silica gel using hexane/ethyl acetate (7:1) to afford the desired product.

Pale yellow solid (254.9 mg, 83%)

17

3-(6-nitro-1*H*-indol-3-yl)-1-phenylpropan-1-one(3q)

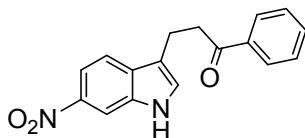

To a mixture of propiophenone (3 mmol, 402.5 mg) and 6-nitroindole (1 mmol, 162.2 mg) in pxylene (3 mL) Cu(OAc)<sub>2</sub> (0.1 mmol, 18.2mg), TMEDA (0.1 mmol, 11.6 mg) and TEMPO (1 mmol, 156.2 mg) were added and stirred at 120 °C under Ar atmosphere for 8 h. The progress of the reaction was monitored by TLC. After complete conversion, the mixture was cooled down to room temperature. Then, the reaction mixture was diluted with H<sub>2</sub>O (30 mL) and extracted by ethyl acetate (30 mL). The separated organic layers were dried over by anhydrous Na<sub>2</sub>SO<sub>4</sub> and filtered. The filtrate was concentrated under reduced pressure and the residue was chromatographed on silica gel using hexane/ethyl acetate (7:1) to afford the desired product.

Yellow solid (220.6 mg, 75%)

18

3-(1*H*-indol-3-yl)-1-(4-methylphenyl)propan-1-one(3r)

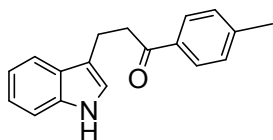

To a mixture of 4'-methylpropiophenone (3 mmol, 444.6 mg) and indole (1 mmol, 117.2 mg) in pxylene (3 mL) Cu(OAc)<sub>2</sub> (0.1 mmol, 18.2mg), TMEDA (0.1 mmol, 11.6 mg) and TEMPO (1 mmol, 156.2 mg) were added and stirred at 120°C under Ar atmosphere for 5 h. The progress of the reaction was monitored by TLC. After complete conversion, the mixture was cooled down to room temperature. Then, the reaction mixture was diluted with H<sub>2</sub>O (30 mL) and extracted by ethyl acetate (30 mL). The separated organic layers were dried over by anhydrous Na<sub>2</sub>SO<sub>4</sub> and filtered. The filtrate was concentrated under reduced pressure and the residue was chromatographed on silica gel using hexane/ethyl acetate (10:1) to afford the desired product.

White solid (228.9 mg, 87%)

19

3-(1H-indol-3-yl)-1-(4-fluorophenyl)propan-1-one(3s)

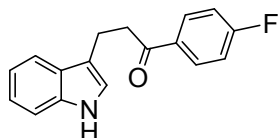

To a mixture of 4'-fluoropropiophenone (3 mmol, 456.5 mg) and indole (1 mmol, 117.2 mg) in pxylene (3 mL) Cu(OAc)<sub>2</sub> (0.1 mmol, 18.2mg), TMEDA (0.1 mmol, 11.6 mg) and TEMPO (1 mmol, 156.2 mg) were added and stirred at 120°C under Ar atmosphere for 5 h. The progress of the reaction was monitored by TLC. After complete conversion, the mixture was cooled down to room temperature. Then, the reaction mixture was diluted with H<sub>2</sub>O (30 mL) and extracted by ethyl acetate (30 mL). The separated organic layers were dried over by anhydrous Na<sub>2</sub>SO<sub>4</sub> and filtered. The filtrate was concentrated under reduced pressure and the residue was chromatographed on silica gel using hexane/ethyl acetate (9:1) to afford the desired product.

Pink solid (213.7 mg, 80%)

20

3-(1H-indol-3-yl)-1-(4-chlorophenyl)propan-1-one(3t)

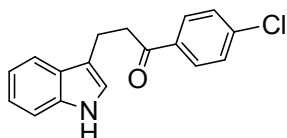

To a mixture of 4'-chloropropiophenone (3 mmol, 505.8 mg) and indole (1 mmol, 117.2 mg) in pxylene (3 mL) Cu(OAc)<sub>2</sub> (0.1 mmol, 18.2mg), TMEDA (0.1 mmol, 11.6 mg) and TEMPO (1 mmol, 156.2 mg) were added and stirred at 120°C under Ar atmosphere for 5 h. The progress of the reaction was monitored by TLC. After complete conversion, the mixture was

cooled down to room temperature. Then, the reaction mixture was diluted with H<sub>2</sub>O (30 mL) and extracted by ethyl acetate (30 mL). The separated organic layers were dried over by anhydrous Na<sub>2</sub>SO<sub>4</sub> and filtered. The filtrate was concentrated under reduced pressure and the residue was chromatographed on silica gel using hexane/ethyl acetate (9:1) to afford the desired product.

Pale yellow solid (246.3.9 mg, 87%)

21

3-(1H-indol-3-yl)-1-(4-bromophenyl)propan-1-one(3u)

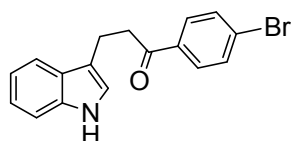

To a mixture of 4'-bromopropiophenone (3 mmol, 639.2 mg) and indole (1 mmol, 117.2 mg) in pxylene (3 mL) Cu(OAc)<sub>2</sub> (0.1 mmol, 18.2mg), TMEDA (0.1 mmol, 11.6 mg) and TEMPO (1 mmol, 156.2 mg) were added and stirred at 120°C under Ar atmosphere for 5 h. The progress of the reaction was monitored by TLC. After complete conversion, the mixture was cooled down to room temperature. Then, the reaction mixture was diluted with H<sub>2</sub>O (30 mL) and extracted by ethyl acetate (30 mL). The separated organic layers were dried over by anhydrous Na<sub>2</sub>SO<sub>4</sub> and filtered. The filtrate was concentrated under reduced pressure and the residue was chromatographed on silica gel using hexane/ethyl acetate (9:1) to afford the desired product.

Brown yellow solid (278.0 mg, 85%)

22

3-(1H-indol-3-yl)-1-(4-methoxyphenyl)propan-1-one(3v)

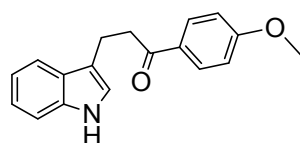

To a mixture of methoxypropioiphenone (3 mmol, 492.6 mg) and indole (1 mmol, 117.2 mg) in pxylene (3 mL) Cu(OAc)<sub>2</sub> (0.1 mmol, 18.2mg), TMEDA (0.1 mmol, 11.6 mg) and TEMPO (1 mmol, 156.2 mg) were added and stirred at 120°C under Ar atmosphere for 5 h. The progress of the reaction was monitored by TLC. After complete conversion, the mixture was cooled down to room temperature. Then, the reaction mixture was diluted with H<sub>2</sub>O (30 mL) and extracted by ethyl acetate (30 mL). The separated organic layers were dried over by anhydrous Na<sub>2</sub>SO<sub>4</sub> and filtered. The filtrate was concentrated under reduced pressure and the residue was chromatographed on silica gel using hexane/ethyl acetate (10:1) to afford the desired product.

Red solid (237.3mg, 85%)

23

3-(1H-indol-3-yl)-1-(4-(trifluoromethyl)phenyl)propan-1-one(3w)

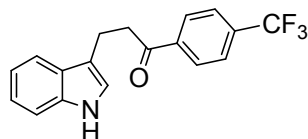

To a mixture of 4'-(trifluoromethyl)propiophenone (3 mmol, 606.5 mg) and indole (1 mmol, 117.2 mg) in pxylene (3 mL) Cu(OAc)<sub>2</sub> (0.1 mmol, 18.2mg), TMEDA (0.1 mmol, 11.6 mg) and TEMPO (1 mmol, 156.2 mg) were added and stirred at 120 °C under Ar atmosphere for 5 h. The progress of the reaction was monitored by TLC. After complete conversion, the mixture was cooled down to room temperature. Then, the reaction mixture was diluted with H<sub>2</sub>O (30 mL) and extracted by ethyl acetate (30 mL). The separated organic layers were dried over by anhydrous Na<sub>2</sub>SO<sub>4</sub> and filtered. The filtrate was concentrated under reduced pressure and the residue was chromatographed on silica gel using hexane/ethyl acetate (8:1) to afford the desired product.

Pale yellow solid (279.0mg, 88%)

24

3-(1H-indol-3-yl)-1-(2-fluorophenyl)propan-1-one(3y)

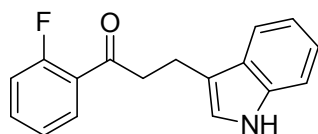

To a mixture of 2'-fluoropropiophenone (3 mmol, 456.5 mg) and indole (1 mmol, 117.2 mg) in pxylene (3 mL) Cu(OAc)<sub>2</sub> (0.1 mmol, 18.2mg), TMEDA (0.1 mmol, 11.6 mg) and TEMPO (1 mmol, 156.2 mg) were added and stirred at 120 °C under Ar atmosphere for 5 h. The progress of the reaction was monitored by TLC. After complete conversion, the mixture was cooled down to room temperature. Then, the reaction mixture was diluted with H<sub>2</sub>O (30 mL) and extracted by ethyl acetate (30 mL). The separated organic layers were dried over by anhydrous Na<sub>2</sub>SO<sub>4</sub> and filtered. The filtrate was concentrated under reduced pressure and the residue was chromatographed on silica gel using hexane/ethyl acetate (9:1) to afford the desired product.

White solid (235.7 mg, 88%)

## V, Analytical data for compounds 3

1,

3-(1H-indol-3-yl)-1-phenylpropan-1-one(3a)

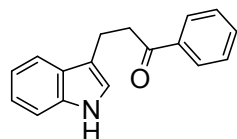

<sup>1</sup>H NMR (400 MHz, DMSO) δ 10.79 (s, 1H), 8.04 – 7.97 (m, 2H), 7.65 – 7.55 (m, 2H), 7.51 (t, *J* = 7.7 Hz, 2H), 7.35 (d, *J* = 8.0 Hz, 1H), 7.17 (s, 1H), 7.08 (t, *J* = 7.5 Hz, 1H), 6.99 (t, *J* = 7.4 Hz,

1H), 3.41 (t, 2H), 3.07 (t,  $J = 8.0$  Hz, 2H).

$^{13}\text{C}$  NMR (101 MHz, DMSO)  $\delta$  199.66 (s), 136.73, 136.26, 132.99, 128.65, 127.89, 127.06, 122.35, 120.89, 118.29, 118.19, 113.62, 111.30, 38.71, 19.36

HRMS (TOF)  $m/z$   $[\text{M} + \text{Na}]^+$  Calcd for  $\text{C}_{17}\text{H}_{15}\text{NO}$  272.1046 found 272.1061.

2,

3-(2-methyl-1*H*-indol-3-yl)-1-phenylpropan-1-one(3b)

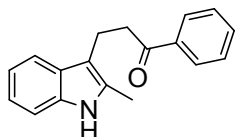

$^1\text{H}$  NMR (400 MHz, DMSO)  $\delta$  10.68 (s, 1H), 7.96 – 7.91 (m, 2H), 7.59 (t,  $J = 7.4$  Hz, 1H), 7.47 (dd,  $J = 16.3, 8.3$  Hz, 3H), 7.23 (d,  $J = 7.7$  Hz, 1H), 7.01 – 6.89 (m, 2H), 3.27 (t,  $J = 7.4$  Hz, 2H), 3.01 (t,  $J = 7.4$  Hz, 2H), 2.31 (s, 3H).

$^{13}\text{C}$  NMR (101 MHz, DMSO)  $\delta$  199.78, 136.66, 135.19, 132.95, 131.62, 128.62, 128.00, 127.85, 119.85, 118.07, 117.39, 110.32, 109.07, 39.09, 18.61, 11.21

HRMS (TOF)  $m/z$   $[\text{M} + \text{Na}]^+$  Calcd for  $\text{C}_{18}\text{H}_{17}\text{NO}$  286.1202 found 286.1211.

3,

3-(4-methyl-1*H*-indol-3-yl)-1-phenylpropan-1-one(3c)

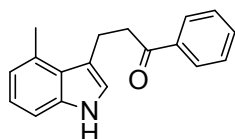

$^1\text{H}$  NMR (400 MHz, DMSO)  $\delta$  10.76 (s, 1H), 8.06 – 8.01 (m, 2H), 7.63 (t,  $J = 7.3$  Hz, 1H), 7.52 (t,  $J = 7.6$  Hz, 2H), 7.16 (d,  $J = 8.1$  Hz, 1H), 7.11 (d,  $J = 1.9$  Hz, 1H), 6.92 (t,  $J = 7.6$  Hz, 1H), 6.70 (d,  $J = 7.0$  Hz, 1H), 3.41 (t,  $J = 7.2$  Hz, 2H), 3.24 (t,  $J = 7.6$  Hz, 2H), 2.64 (s, 3H).

$^{13}\text{C}$  NMR (101 MHz, DMSO)  $\delta$  199.54, 136.72 (d,  $J = 2.9$  Hz), 133.04, 129.54, 128.67, 127.93, 125.54, 122.33, 120.88, 119.81, 114.52, 109.35, 21.28, 20.02.

HRMS (TOF)  $m/z$   $[\text{M} + \text{Na}]^+$  Calcd for  $\text{C}_{18}\text{H}_{17}\text{NO}$  286.1202 found 286.1230.

4,

3-(5-methyl-1*H*-indol-3-yl)-1-phenylpropan-1-one(3d)

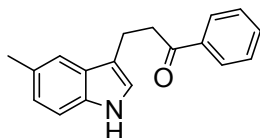

$^1\text{H}$  NMR (400 MHz, DMSO)  $\delta$  10.63 (s, 1H), 8.00 (dd,  $J = 8.2, 1.1$  Hz, 2H), 7.62 (tt,  $J = 7.6, 1.2$  Hz, 1H), 7.51 (t,  $J = 7.6$  Hz, 2H), 7.33 (s, 1H), 7.22 (d,  $J = 8.2$  Hz, 1H), 7.10 (d,  $J = 1.9$  Hz, 1H), 6.89 (d,  $J = 8.2$  Hz, 1H), 3.40 (t,  $J = 7.5$  Hz, 2H), 3.02 (t,  $J = 7.5$  Hz, 2H), 2.38 (s, 3H).

$^{13}\text{C}$  NMR (101 MHz, DMSO)  $\delta$  199.70, 136.74, 134.62, 132.99, 128.66, 127.90, 127.27, 126.54, 122.48, 122.40, 117.89, 113.05, 111.00, 38.75, 21.24, 19.38

HRMS (TOF)  $m/z$   $[\text{M} + \text{Na}]^+$  Calcd for  $\text{C}_{18}\text{H}_{17}\text{NO}$  286.1202 found 286.1216.

5,

3-(6-methyl-1*H*-indol-3-yl)-1-phenylpropan-1-one(3e)

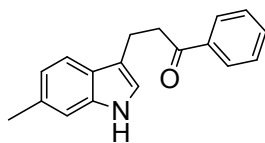

<sup>1</sup>H NMR (400 MHz, DMSO)  $\delta$  10.60 (s, 1H), 8.01 – 7.97 (m, 2H), 7.62 (tt,  $J$  = 7.6, 1.2 Hz, 1H), 7.51 ((tt,  $J$  = 8.0, 1.6 Hz, 2H), 7.42 (d,  $J$  = 8.0 Hz, 1H), 7.12 (s, 1H), 7.06 (d,  $J$  = 2.1 Hz, 1H), 6.81 (dd,  $J$  = 8.0, 0.9 Hz, 1H), 3.39 (t,  $J$  = 7.5 Hz, 2H), 3.02 (t,  $J$  = 7.4 Hz, 2H), 2.38 (s, 3H).

<sup>13</sup>C NMR (101 MHz, DMSO)  $\delta$  199.69, 136.71 (d,  $J$  = 3.9 Hz), 133.00, 129.81, 128.66, 127.88, 125.02, 121.58, 119.94, 117.99, 113.43, 111.11, 38.68, 21.36, 19.43.

HRMS (TOF)  $m/z$  [M + Na]<sup>+</sup> Calcd for C<sub>18</sub>H<sub>17</sub>NO 286.1202 found 286.1232.

6,

3-(7-methyl-1*H*-indol-3-yl)-1-phenylpropan-1-one(3f)

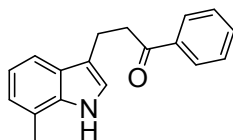

<sup>1</sup>H NMR (400 MHz, DMSO)  $\delta$  10.75 (s, 1H), 8.00 (d,  $J$  = 7.4 Hz, 2H), 7.62 (t,  $J$  = 7.3 Hz, 1H), 7.51 (t,  $J$  = 7.5 Hz, 2H), 7.39 (d,  $J$  = 7.2 Hz, 1H), 7.16 (d,  $J$  = 2.1 Hz, 1H), 6.918- 6.858(m, 2H), 3.41 (t,  $J$  = 7.5 Hz, 2H), 3.05 (t,  $J$  = 7.3 Hz, 2H), 2.44 (s, 3H).

<sup>13</sup>C NMR (101 MHz, DMSO)  $\delta$  199.66, 136.73, 135.77, 133.00, 128.66, 127.89, 126.72, 122.07, 121.40, 120.34, 118.42, 115.90, 114.04, 38.70, 19.48, 16.74

HRMS (TOF)  $m/z$  [M + Na]<sup>+</sup> Calcd for C<sub>18</sub>H<sub>17</sub>NO 286.1202 found 286.1225.

7,

3-(1-methyl-1*H*-indol-3-yl)-1-phenylpropan-1-one(3g)

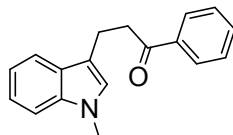

<sup>1</sup>H NMR (400 MHz, DMSO)  $\delta$  7.99 (tt,  $J$  = 8.3, 1.2 Hz, 2H), 7.62 (tt,  $J$  = 7.2, 1.2 Hz, 1H), 7.57 (d,  $J$  = 7.7 Hz, 1H), 7.54 – 7.49 (m, 2H), 7.36 (d,  $J$  = 8.2 Hz, 1H), 7.17 – 7.10 (m, 2H), 7.05 – 6.99 (m, 1H), 3.71 (s, 3H), 3.40 (t,  $J$  = 7.6 Hz, 2H), 3.04 (t,  $J$  = 7.4 Hz, 2H).

<sup>13</sup>C NMR (101 MHz, DMSO)  $\delta$  199.50, 136.68, 136.63, 133.02, 128.66, 127.88, 127.35, 126.81, 121.02, 118.53, 118.27, 113.01, 109.45, 38.73, 32.16, 19.11

HRMS (TOF)  $m/z$  [M + H]<sup>+</sup> Calcd for C<sub>18</sub>H<sub>17</sub>NO 264.1383 found 264.1372.

8,

3-(5-nitro-1*H*-indol-3-yl)-1-phenylpropan-1-one(3h)

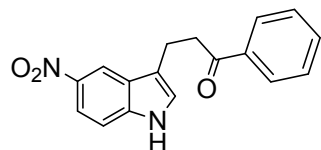

<sup>1</sup>H NMR (400 MHz, DMSO)  $\delta$  11.57 (s, 1H), 8.57 (d,  $J$  = 1.9 Hz, 1H), 8.01-7.95 (m, 3H), 7.62 (t,  $J$  = 7.3 Hz, 1H), 7.51 (t,  $J$  = 8.5 Hz, 3H), 7.44 (s, 1H), 3.45 (t,  $J$  = 7.3 Hz, 2H), 3.12 (t,  $J$  = 7.2 Hz, 2H).

<sup>13</sup>C NMR (101 MHz, DMSO)  $\delta$  199.41, 140.19, 139.31, 136.66, 133.06, 128.65, 127.90, 126.41 (d,  $J$  = 3.6 Hz), 116.92, 116.37, 115.77, 111.72, 38.64, 18.77

HRMS (TOF)  $m/z$  [M + Na]<sup>+</sup> Calcd for C<sub>17</sub>H<sub>14</sub>N<sub>2</sub>O<sub>3</sub> 317.0897 found 317.0907.

9

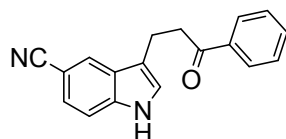

10,

3-(5-fluoro-1*H*-indol-3-yl)-1-phenylpropan-1-one(3j)

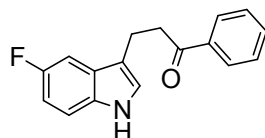

<sup>1</sup>H NMR (400 MHz, DMSO)  $\delta$  10.89 (s, 1H), 8.00 (d,  $J$  = 7.4 Hz, 2H), 7.62 (t,  $J$  = 7.3 Hz, 1H), 7.51 (t,  $J$  = 7.5 Hz, 2H), 7.32 (dd,  $J$  = 8.5, 4.5 Hz, 2H), 7.25 (s, 1H), 6.90 (td,  $J$  = 9.3, 2.4 Hz, 1H), 3.41 (t,  $J$  = 7.4 Hz, 2H), 3.02 (t,  $J$  = 7.4 Hz, 2H).

<sup>13</sup>C NMR (101 MHz, DMSO)  $\delta$  199.60, 157.76, 155.46, 136.72, 132.93 (d,  $J$  = 12.1 Hz), 128.63, 127.89, 127.26 (d,  $J$  = 10.0 Hz), 124.58, 113.97 (d,  $J$  = 4.8 Hz), 112.15 (d,  $J$  = 9.6 Hz), 109.06, 108.80, 103.19, 102.96, 38.55, 19.19.

HRMS (TOF)  $m/z$  [M + Na]<sup>+</sup> Calcd for C<sub>17</sub>H<sub>14</sub>NOF 290.0952 found 290.0960.

11,

3-(5-chloro-1*H*-indol-3-yl)-1-phenylpropan-1-one(3k)

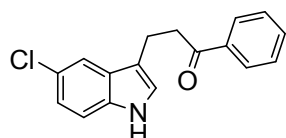

<sup>1</sup>H NMR (400 MHz, DMSO)  $\delta$  10.99 (s, 1H), 8.03 – 7.96 (m, 2H), 7.64 – 7.58 (m, 2H), 7.51 (tt,  $J$  = 7.6, 1.6 Hz, 2H), 7.34 (d,  $J$  = 8.6 Hz, 1H), 7.24 (d,  $J$  = 2.2 Hz, 1H), 7.05 (dd,  $J$  = 8.6, 2.0 Hz, 1H),

3.40 (t,  $J$  = 7.6 Hz, 2H), 3.02 (t,  $J$  = 7.3 Hz, 2H).

$^{13}\text{C}$  NMR (101 MHz, DMSO)  $\delta$  199.57, 136.70, 134.65, 133.01, 128.64, 128.20, 127.89, 124.34, 122.94, 120.79, 117.66, 113.68, 112.79, 38.68, 19.03

HRMS (TOF)  $m/z$   $[\text{M} + \text{Na}]^+$  Calcd for  $\text{C}_{17}\text{H}_{14}\text{NOCl}$  306.0656 found 306.0659.

12,

3-(5-bromo-1*H*-indol-3-yl)-1-phenylpropan-1-one(3l)

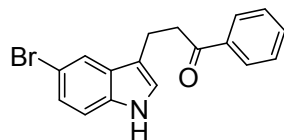

$^1\text{H}$  NMR (400 MHz, DMSO)  $\delta$  11.01 (s, 1H), 7.98 (d,  $J$  = 4 Hz, 2H), 7.75 (s, 1H), 7.62 (t,  $J$  = 6.4 Hz, 1H), 7.51 (t,  $J$  = 7.2 Hz, 2H), 7.31 (d,  $J$  = 6.1 Hz, 1H), 7.23 (s, 1H), 7.18 (d,  $J$  = 7.6 Hz, 1H), 3.40 (t,  $J$  = 7.4 Hz, 2H), 3.03 (t,  $J$  = 7.2 Hz, 2H).

$^{13}\text{C}$  NMR (101 MHz, DMSO)  $\delta$  199.52, 136.71, 134.88, 132.99, 128.93, 128.63, 127.89, 124.18, 123.32, 120.69, 113.62, 113.28, 110.92, 38.71, 19.02

HRMS (TOF)  $m/z$   $[\text{M} - \text{H}]^-$  Calcd for  $\text{C}_{17}\text{H}_{14}\text{NOBr}$  326.0186 found 326.0156.

13,

3-(5-hydroxy-1*H*-indol-3-yl)-1-phenylpropan-1-one(3m)

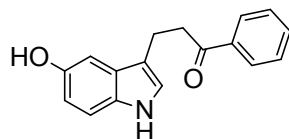

$^1\text{H}$  NMR (400 MHz, DMSO)  $\delta$  10.46 (s, 1H), 8.60 (s, 1H), 7.99 (dt,  $J$  = 7.2, 1.2 Hz, 2H), 7.62 (tt,  $J$  = 7.4 0.8 Hz, 1H), 7.51 (t,  $J$  = 7.6 Hz, 2H), 7.14 (d,  $J$  = 8.6 Hz, 1H), 7.06 (d,  $J$  = 2.1 Hz, 1H), 6.86 (d,  $J$  = 2.2 Hz, 1H), 6.61 (dd,  $J$  = 8.6, 2.3 Hz, 1H), 3.36 (t,  $J$  = 7.7 Hz, 2H), 2.96 (t,  $J$  = 7.4 Hz, 2H).

$^{13}\text{C}$  NMR (101 MHz, DMSO)  $\delta$  199.74, 150.15, 136.72, 133.01, 130.82, 128.67, 127.88, 127.71, 122.79, 112.62, 111.63, 111.24, 102.19, 38.60, 19.48

HRMS (TOF)  $m/z$   $[\text{M} + \text{Na}]^+$  Calcd for  $\text{C}_{17}\text{H}_{15}\text{NO}_2$  288.0995 found 288.0995.

14,

3-(5-methoxy-1*H*-indol-3-yl)-1-phenylpropan-1-one(3n)

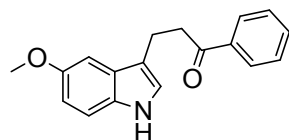

$^1\text{H}$  NMR (400 MHz, DMSO)  $\delta$  10.61 (s, 1H), 8.00 (d,  $J$  = 7.5 Hz, 2H), 7.63 (t,  $J$  = 7.2 Hz, 1H), 7.52 (t,  $J$  = 7.5 Hz, 2H), 7.22 (d,  $J$  = 8.7 Hz, 1H), 7.12 (s, 1H), 7.03 (s, 1H), 6.71 (dd,  $J$  = 8.6, 1.8 Hz, 1H), 3.76 (s, 3H), 3.41 (t,  $J$  = 7.4 Hz, 2H), 3.02 (t,  $J$  = 7.3 Hz, 2H).

$^{13}\text{C}$  NMR (101 MHz, DMSO)  $\delta$  199.76, 152.93, 136.75, 133.00, 131.36, 128.66, 127.90, 127.33, 123.02, 113.38, 111.92, 111.05, 100.14, 55.32, 38.64, 19.38

HRMS (TOF)  $m/z$   $[\text{M} + \text{Na}]^+$  Calcd for  $\text{C}_{18}\text{H}_{17}\text{NO}_2$  302.1151 found 302.1191.

15,

3-(5-carboxy-1*H*-indol-3-yl)-1-phenylpropan-1-one(3o)

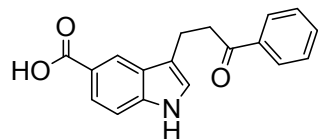

<sup>1</sup>H NMR (400 MHz, DMSO)  $\delta$  11.18 (s, 1H), 8.29 (s, 1H), 7.98 (d,  $J$  = 7.6 Hz, 2H), 7.75 (dd,  $J$  = 8.5, 1.4 Hz, 1H), 7.61 (t,  $J$  = 7.3 Hz, 1H), 7.50 (t,  $J$  = 7.6 Hz, 2H), 7.42 (d,  $J$  = 8.5 Hz, 1H), 7.30 (s, 1H), 3.43 (t,  $J$  = 7.3 Hz, 2H), 3.11 (t,  $J$  = 7.3 Hz, 2H).

<sup>13</sup>C NMR (101 MHz, DMSO)  $\delta$  199.49, 168.52, 138.70, 136.67, 133.01, 128.63, 127.88, 126.64, 124.04, 122.30, 121.05, 120.87, 115.25, 111.06, 38.65, 19.02

HRMS (TOF)  $m/z$  [M - H]<sup>-</sup> Calcd for C<sub>18</sub>H<sub>15</sub>NO<sub>3</sub> 292.0979 found 292.0988.

16,

3-(5-methoxycarbonyl-1*H*-indol-3-yl)-1-phenylpropan-1-one(3p)

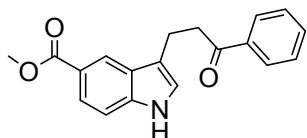

<sup>1</sup>H NMR (400 MHz, DMSO)  $\delta$  11.23 (s, 1H), 8.27 (s, 1H), 8.00 (d,  $J$  = 7.3 Hz, 2H), 7.73 (dd,  $J$  = 8.6, 1.4 Hz, 1H), 7.62 (t,  $J$  = 7.3 Hz, 1H), 7.51 (t,  $J$  = 7.6 Hz, 2H), 7.42 (d,  $J$  = 8.6 Hz, 1H), 7.31 (d,  $J$  = 1.6 Hz, 1H), 3.84 (s, 3H), 3.43 (t,  $J$  = 7.4 Hz, 2H), 3.10 (t,  $J$  = 7.3 Hz, 2H).

<sup>13</sup>C NMR (101 MHz, DMSO)  $\delta$  199.45, 167.32, 138.81, 136.67, 133.03, 128.64, 127.90, 126.67, 124.29, 121.98, 120.92, 119.78, 115.36, 111.27, 51.56, 38.66, 18.98

HRMS (TOF)  $m/z$  [M + Na]<sup>+</sup> Calcd for C<sub>19</sub>H<sub>17</sub>NO<sub>3</sub> 330.1101 found 330.1092.

17

3-(6-nitro-1*H*-indol-3-yl)-1-phenylpropan-1-one(3q)

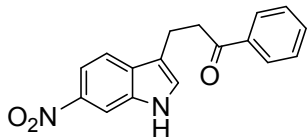

<sup>1</sup>H NMR (400 MHz, DMSO)  $\delta$  11.61 (s, 1H), 8.30 (d,  $J$  = 7.6 Hz, 1H), 8.03 – 7.96 (m, 2H), 7.90 – 7.84 (m, 1H), 7.79-7.74 (m, 1H), 7.66-7.59 (m, 2H), 7.55 – 7.46 (m, 2H), 3.44 (m, 2H), 3.10 (t,  $J$  = 7.1 Hz, 2H).

<sup>13</sup>C NMR (101 MHz, DMSO)  $\delta$  199.28, 141.78, 136.62, 134.48, 133.03, 131.75, 129.80, 128.61, 127.87, 118.59, 115.29, 113.42, 108.14, 38.52, 18.84

HRMS (TOF)  $m/z$  [M + K]<sup>+</sup> Calcd for C<sub>17</sub>H<sub>14</sub>N<sub>2</sub>O<sub>3</sub> 333.0636 found 333.0618.

18

3-(1H-indol-3-yl)-1-(4-methylphenyl)propan-1-one(3r)

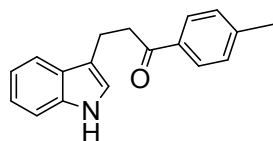

$^1\text{H}$  NMR (400 MHz, DMSO)  $\delta$  10.77 (s, 1H), 7.90 (d,  $J$  = 8.2 Hz, 2H), 7.55 (d,  $J$  = 7.8 Hz, 1H), 7.35- 7.30 (m, 3H), 7.16 (d,  $J$  = 2.1 Hz, 1H), 7.10 – 7.04 (m, 1H), 7.01 – 6.95 (m, 1H), 3.37 (dd,  $J$  = 12.8, 5.0 Hz, 2H), 3.04 (t,  $J$  = 7.4 Hz, 2H), 2.36 (s, 3H).

$^{13}\text{C}$  NMR (101 MHz, DMSO)  $\delta$  199.17, 143.30, 136.24, 134.27, 129.19, 128.01, 127.05, 122.33, 120.86, 118.27, 118.17, 113.65, 111.29, 38.56, 21.09, 19.42

HRMS (TOF)  $m/z$   $[\text{M} + \text{Na}]^+$  Calcd for  $\text{C}_{18}\text{H}_{17}\text{NO}$  286.1202 found 286.1203.

19

3-(1H-indol-3-yl)-1-(4-fluorophenyl)propan-1-one(3s)

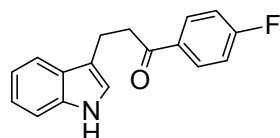

$^1\text{H}$  NMR (400 MHz, DMSO)  $\delta$  10.79 (s, 1H), 8.07 (dd,  $J$  = 8.5, 5.7 Hz, 2H), 7.56 (d,  $J$  = 7.8 Hz, 1H), 7.37-7.28 (m, 3H), 7.17 (d,  $J$  = 1.4 Hz, 1H), 7.08 (t,  $J$  = 7.5 Hz, 1H), 6.98 (t,  $J$  = 7.4 Hz, 1H), 3.39 (t,  $J$  = 7.6 Hz, 2H), 3.06 (t,  $J$  = 7.4 Hz, 2H).

$^{13}\text{C}$  NMR (101 MHz, DMSO)  $\delta$  198.24, 166.17, 163.67, 136.26, 133.45 (d,  $J$  = 2.7 Hz), 130.85 (d,  $J$  = 9.5 Hz), 127.05, 122.35, 120.89, 118.24 (d,  $J$  = 9.3 Hz), 115.69, 115.47, 113.56, 111.30, 38.65, 19.31

HRMS (TOF)  $m/z$   $[\text{M} + \text{Na}]^+$  Calcd for  $\text{C}_{17}\text{H}_{14}\text{NOF}$  290.0952 found 290.0964 .

20

3-(1H-indol-3-yl)-1-(4-chlorophenyl)propan-1-one(3t)

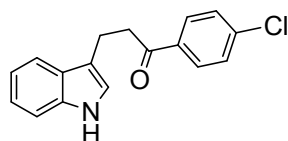

$^1\text{H}$  NMR (400 MHz, DMSO)  $\delta$  10.77 (s, 1H), 8.03 – 7.98 (m, 2H), 7.61 – 7.52 (m, 3H), 7.33 (d,  $J$  = 8.1 Hz, 1H), 7.15 (d,  $J$  = 2.2 Hz, 1H), 7.09 – 7.03 (m, 1H), 7.00 – 6.94 (m, 1H), 3.41 (t,  $J$  = 7.5 Hz, 2H), 3.04 (t,  $J$  = 7.4 Hz, 2H).

$^{13}\text{C}$  NMR (101 MHz, DMSO)  $\delta$  198.72, 137.92, 136.22, 135.37, 129.84, 128.76, 127.01, 122.36, 120.88, 118.22 (d,  $J$  = 10.8 Hz), 113.47, 111.28, 38.70, 19.24.

HRMS (TOF)  $m/z$   $[\text{M} + \text{Na}]^+$  Calcd for  $\text{C}_{17}\text{H}_{14}\text{NOCl}$  306.0656 found 306.0665.

21

3-(1H-indol-3-yl)-1-(4-bromophenyl)propan-1-one(3u)

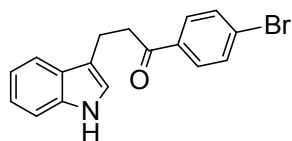

$^1\text{H}$  NMR (400 MHz, DMSO)  $\delta$  10.77 (s, 1H), 7.92 (d,  $J$  = 8.3 Hz, 2H), 7.71 (d,  $J$  = 8.2 Hz, 2H), 7.55 (d,  $J$  = 7.8 Hz, 1H), 7.33 (d,  $J$  = 8.0 Hz, 1H), 7.16 (d,  $J$  = 1.6 Hz, 1H), 7.06 (t,  $J$  = 7.5 Hz, 1H), 6.97 (t,  $J$  = 7.4 Hz, 1H), 3.40 (t,  $J$  = 7.4 Hz, 2H), 3.04 (t,  $J$  = 7.4 Hz, 2H).

$^{13}\text{C}$  NMR (101 MHz, DMSO)  $\delta$  198.88, 136.24, 135.69, 131.70, 129.94, 127.08, 127.02, 122.36, 120.88, 118.28, 118.18, 113.47, 111.29, 38.70, 19.24

HRMS (TOF)  $m/z$   $[\text{M} + \text{H}]^+$  Calcd for  $\text{C}_{17}\text{H}_{14}\text{NOBr}$  328.0332 found 328.0301.

22

3-(1H-indol-3-yl)-1-(4-methoxyphenyl)propan-1-one(3v)

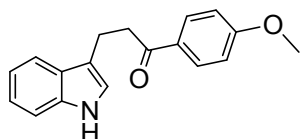

$^1\text{H}$  NMR (400 MHz, DMSO)  $\delta$  10.78 (s, 1H), 7.98 (d,  $J$  = 8.8 Hz, 2H), 7.55 (d,  $J$  = 7.8 Hz, 1H), 7.34 (d,  $J$  = 8.0 Hz, 1H), 7.16 (d,  $J$  = 2.0 Hz, 1H), 7.09-6.96 (m, 4H), 3.83 (s, 3H), 3.35 (t,  $J$  = 7.6 Hz, 2H), 3.04 (t,  $J$  = 7.4 Hz, 2H).

$^{13}\text{C}$  NMR (101 MHz, DMSO)  $\delta$  198.02, 162.98, 136.24, 130.19, 129.70, 127.06, 122.32, 120.86, 118.27, 118.17, 113.81, 113.73, 111.29, 55.45, 38.31, 19.53

HRMS (TOF)  $m/z$   $[\text{M} + \text{Na}]^+$  Calcd for  $\text{C}_{18}\text{H}_{17}\text{NO}_2$  302.1151 found 302.1181.

23

3-(1H-indol-3-yl)-1-(4-(trifluoromethyl)phenyl)propan-1-one(3w)

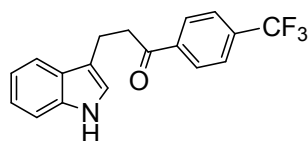

$^1\text{H}$  NMR (400 MHz, DMSO)  $\delta$  10.79 (s, 1H), 8.17 (d,  $J$  = 8.1 Hz, 2H), 7.87 (d,  $J$  = 8.2 Hz, 2H), 7.57 (d,  $J$  = 7.8 Hz, 1H), 7.34 (d,  $J$  = 8.1 Hz, 1H), 7.17 (d,  $J$  = 2.2 Hz, 1H), 7.11 – 7.03 (m, 1H), 7.02 – 6.94 (m, 1H), 3.48 (t,  $J$  = 7.5 Hz, 2H), 3.07 (t,  $J$  = 7.4 Hz, 2H).

$^{13}\text{C}$  NMR (101 MHz, DMSO)  $\delta$  199.13, 139.83, 136.25, 132.54, 132.22, 128.70, 127.01, 125.62 (d,  $J$  = 3.7 Hz), 125.13, 122.37, 120.89, 118.29, 118.18, 113.38, 111.29, 19.14.

HRMS (TOF)  $m/z$   $[\text{M} - \text{H}]^-$  Calcd for  $\text{C}_{18}\text{H}_{14}\text{NOF}_3$  316.0955 found 316.0969.

24

3-(1H-indol-3-yl)-1-(2-fluorophenyl)propan-1-one(3y)

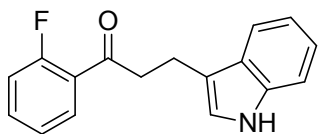

$^1\text{H}$  NMR (400 MHz, DMSO)  $\delta$  10.79 (s, 1H), 7.83 (td,  $J$  = 7.7, 1.7 Hz, 1H), 7.67 – 7.61 (m, 1H), 7.54 (d,  $J$  = 7.8 Hz, 1H), 7.36-7.30 (m, 3H), 7.12 (d,  $J$  = 1.8 Hz, 1H), 7.07 (t,  $J$  = 7.5 Hz, 1H), 6.97 (t,  $J$  = 7.4 Hz, 1H), 3.35 (td,  $J$  = 7.6, 2.4 Hz, 2H), 3.05 (t,  $J$  = 7.4 Hz, 2H).

$^{13}\text{C}$  NMR (101 MHz, DMSO)  $\delta$  197.81 (d,  $J$  = 3.4 Hz), 162.16, 159.64, 136.24, 134.78 (d,  $J$  = 9.1 Hz), 130.20 (d,  $J$  = 2.4 Hz), 126.96, 125.61, 125.48, 124.75 (d,  $J$  = 3.2 Hz), 122.31, 120.89, 118.20 (d,  $J$  = 1.4 Hz), 116.91, 116.68, 113.36, 111.32, 43.36 (d,  $J$  = 5.7 Hz), 19.19.

HRMS (TOF)  $m/z$   $[\text{M} + \text{Na}]^+$  Calcd for  $\text{C}_{17}\text{H}_{14}\text{NOF}$  290.0952 found 290.0948 .

## VI, $^1\text{H}$ NMR and $^{13}\text{C}$ NMR spectra of compounds 3

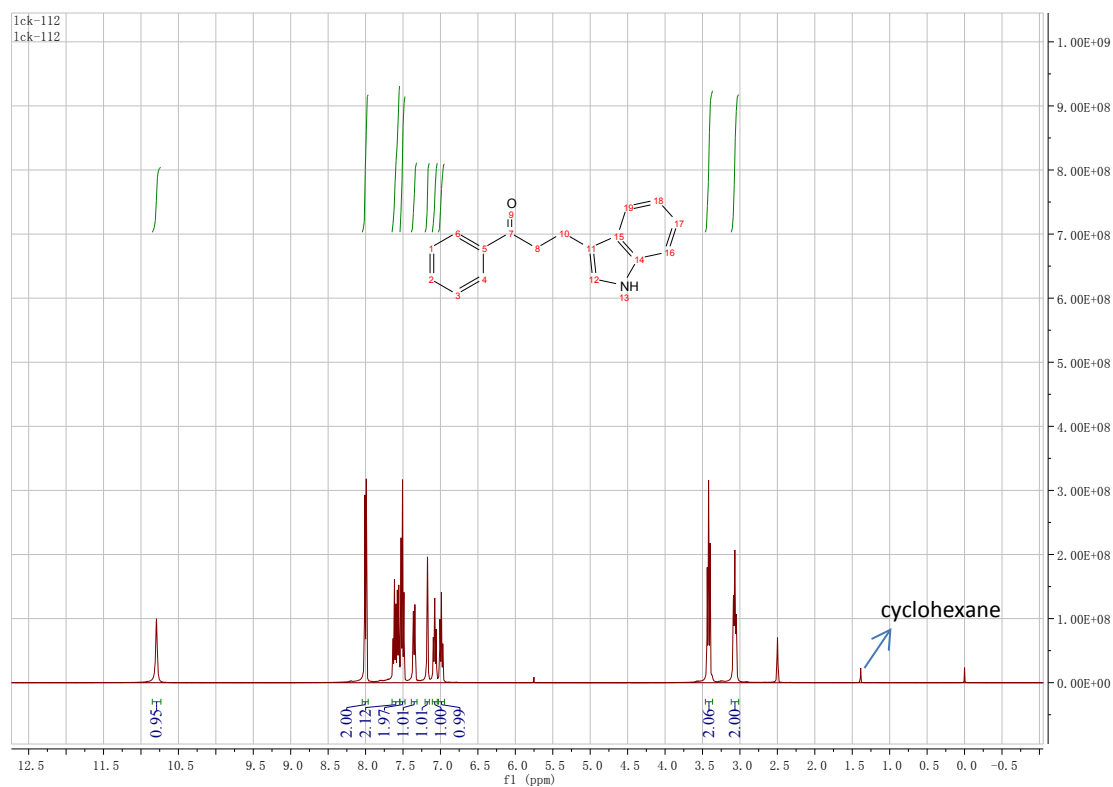

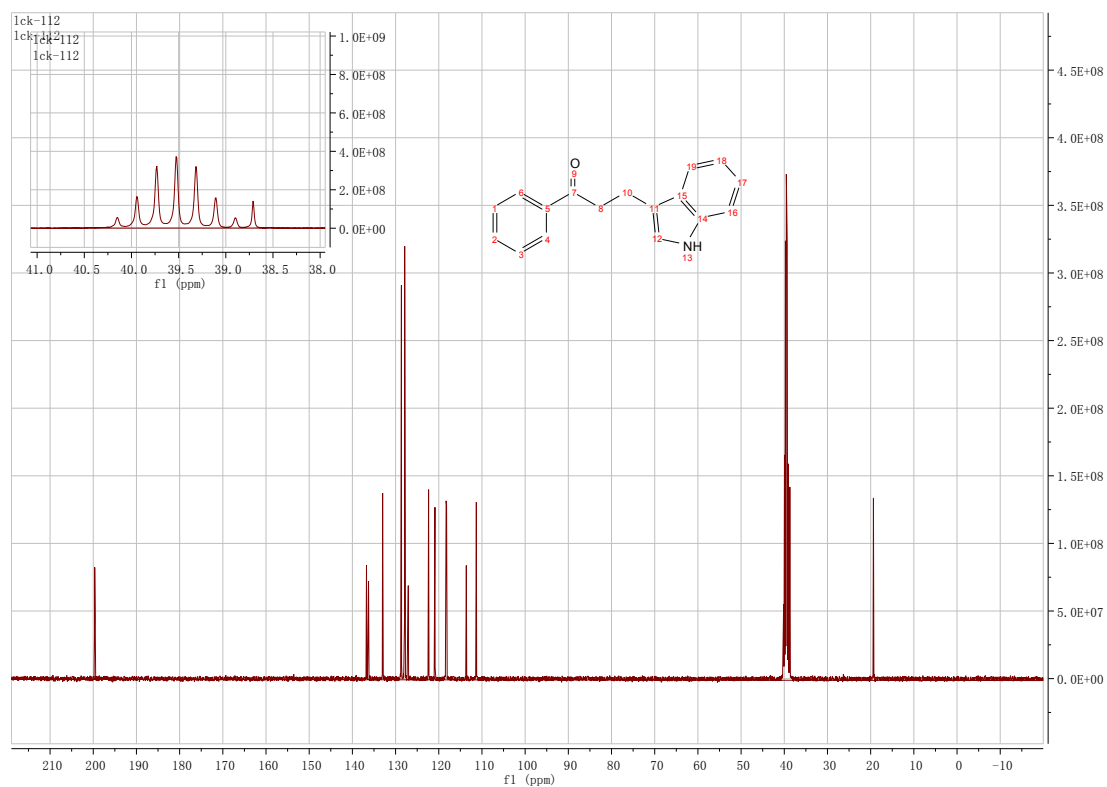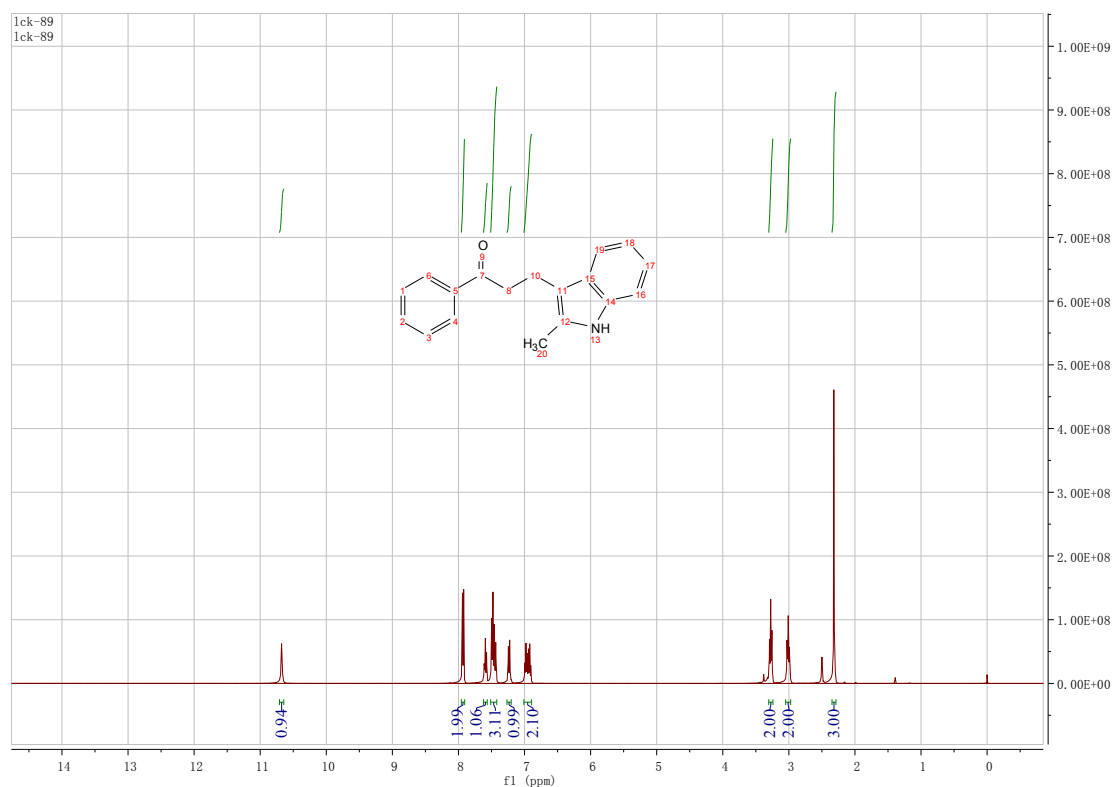

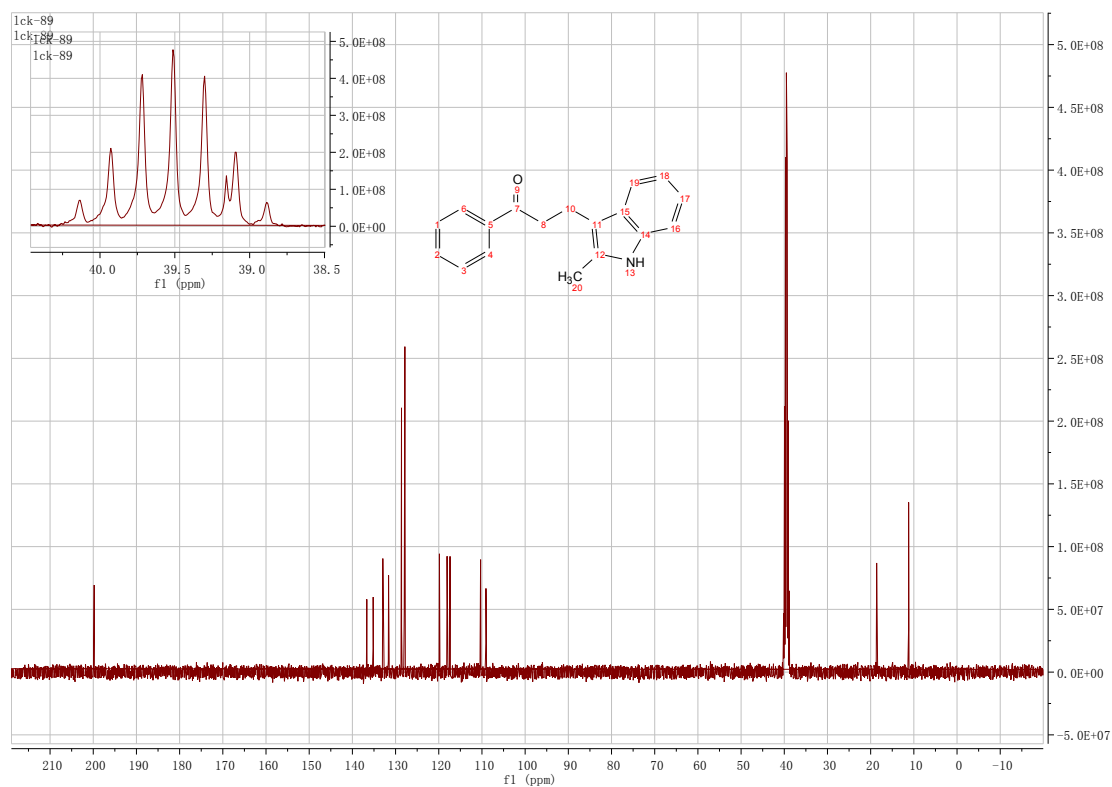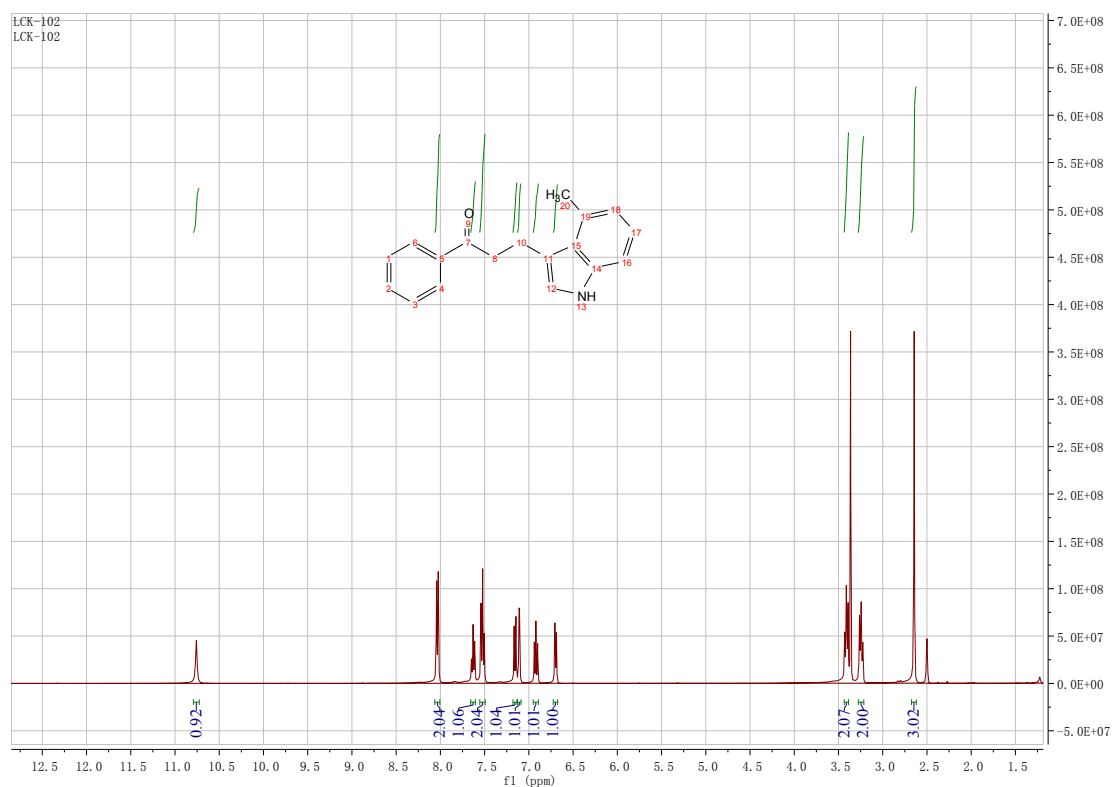

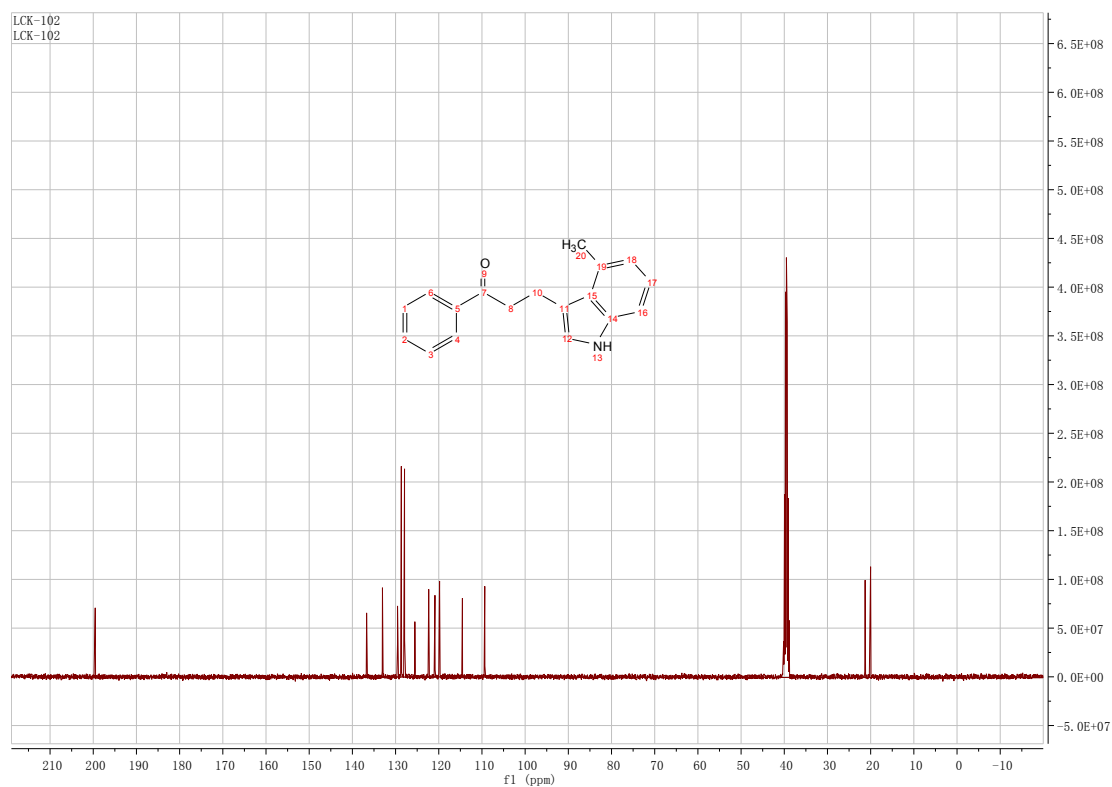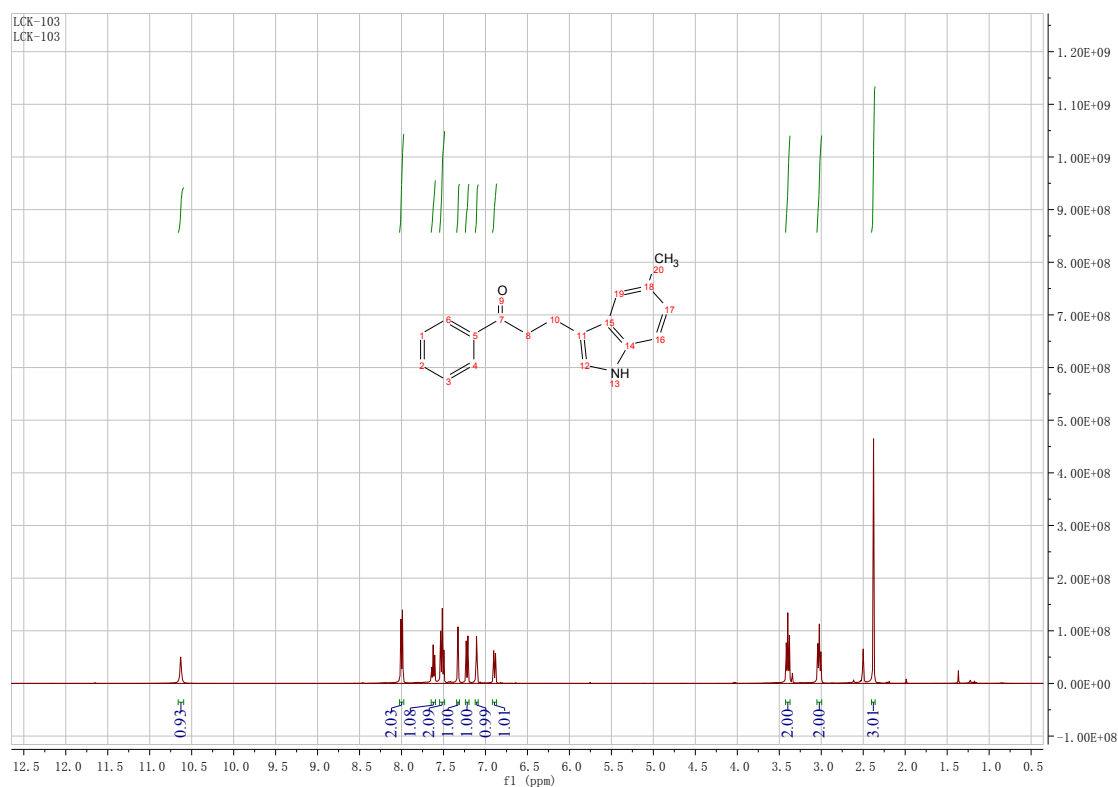

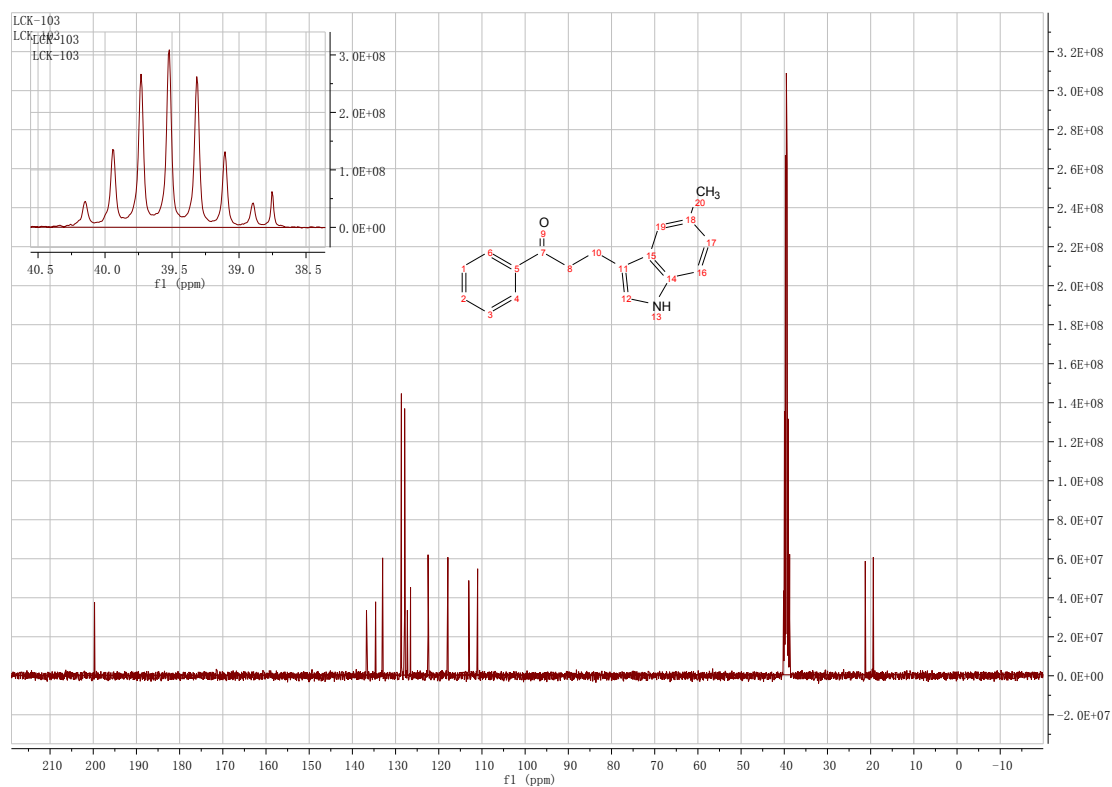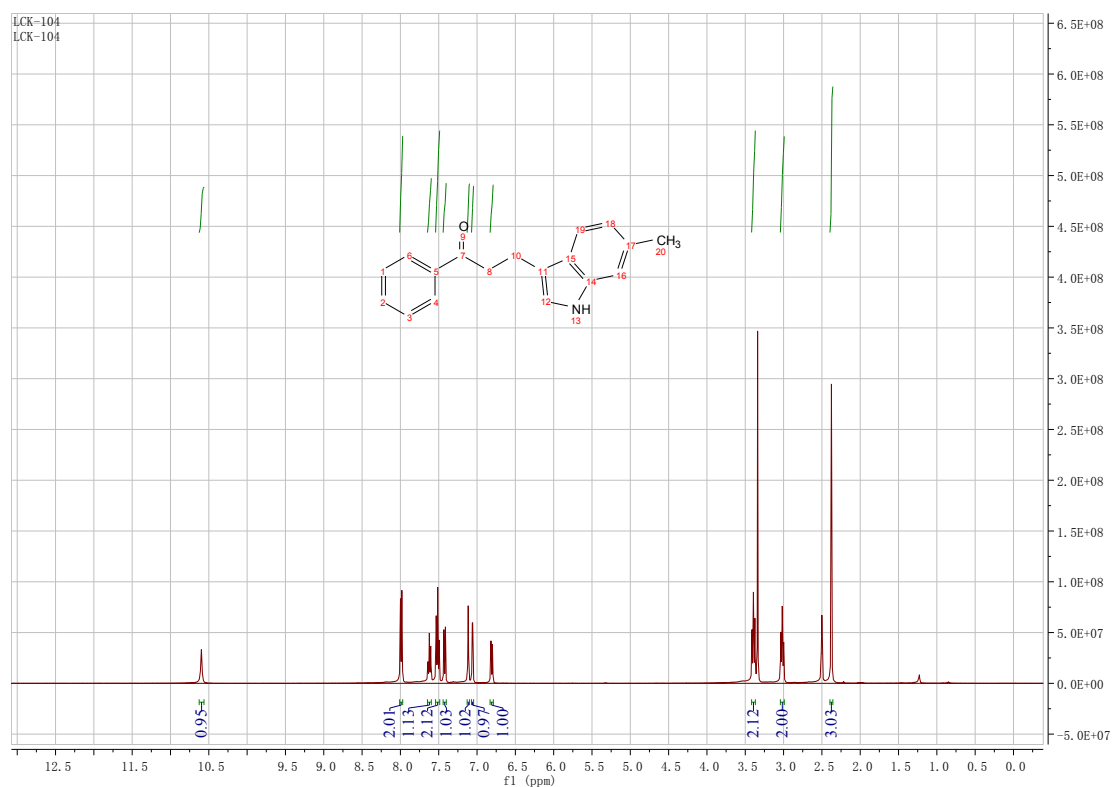

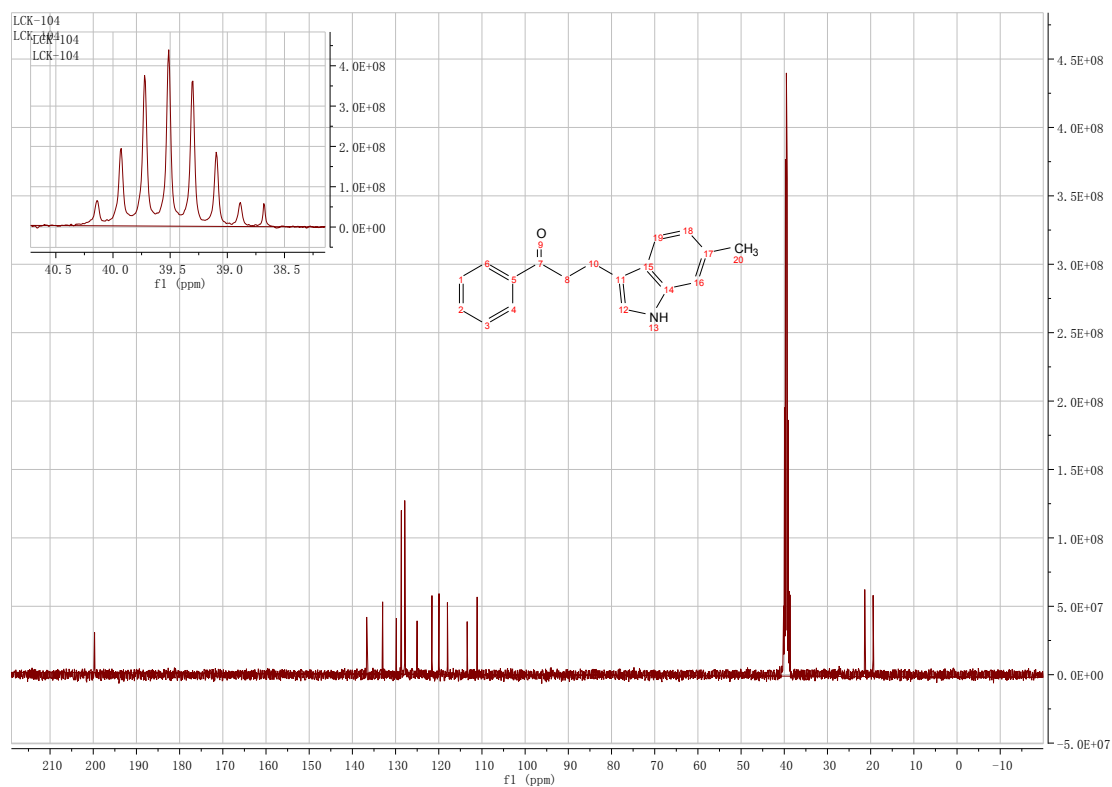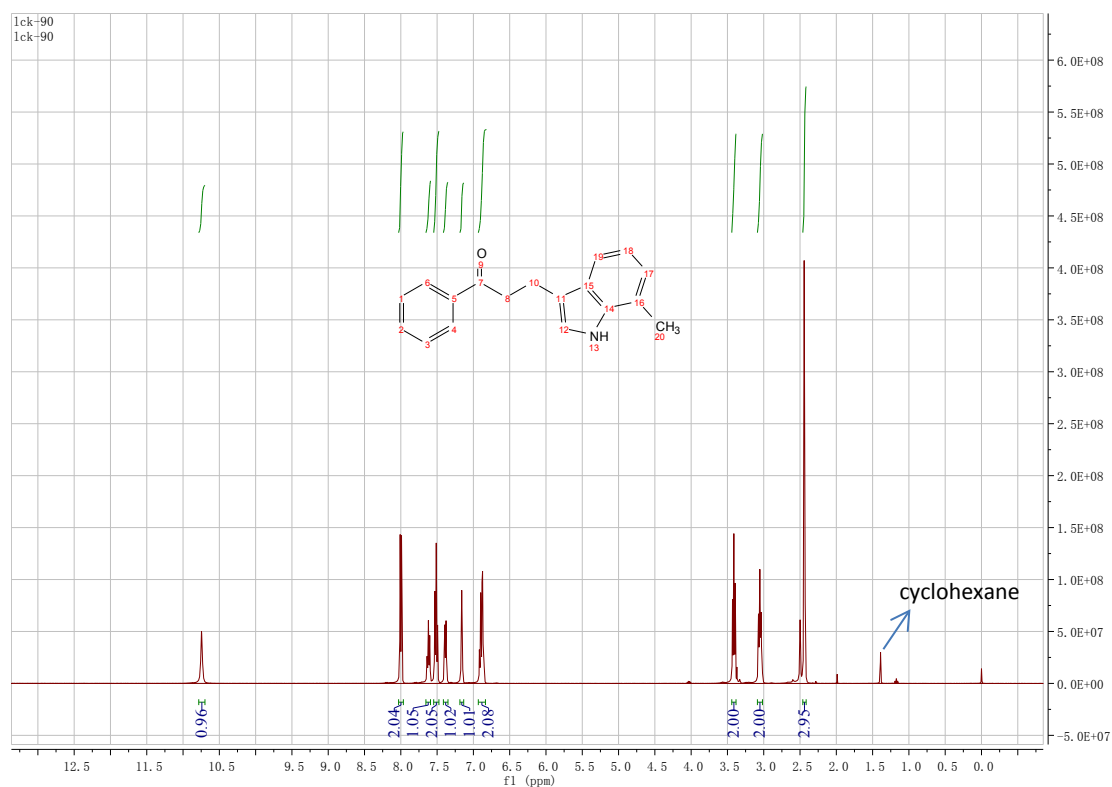

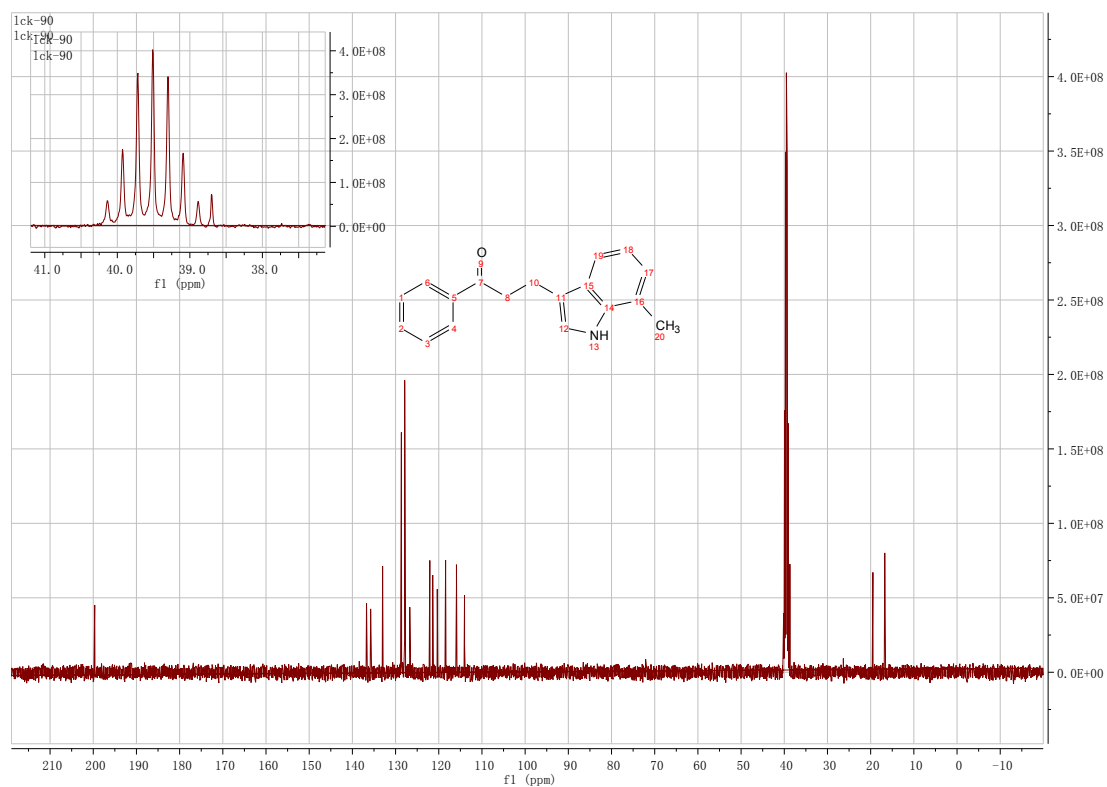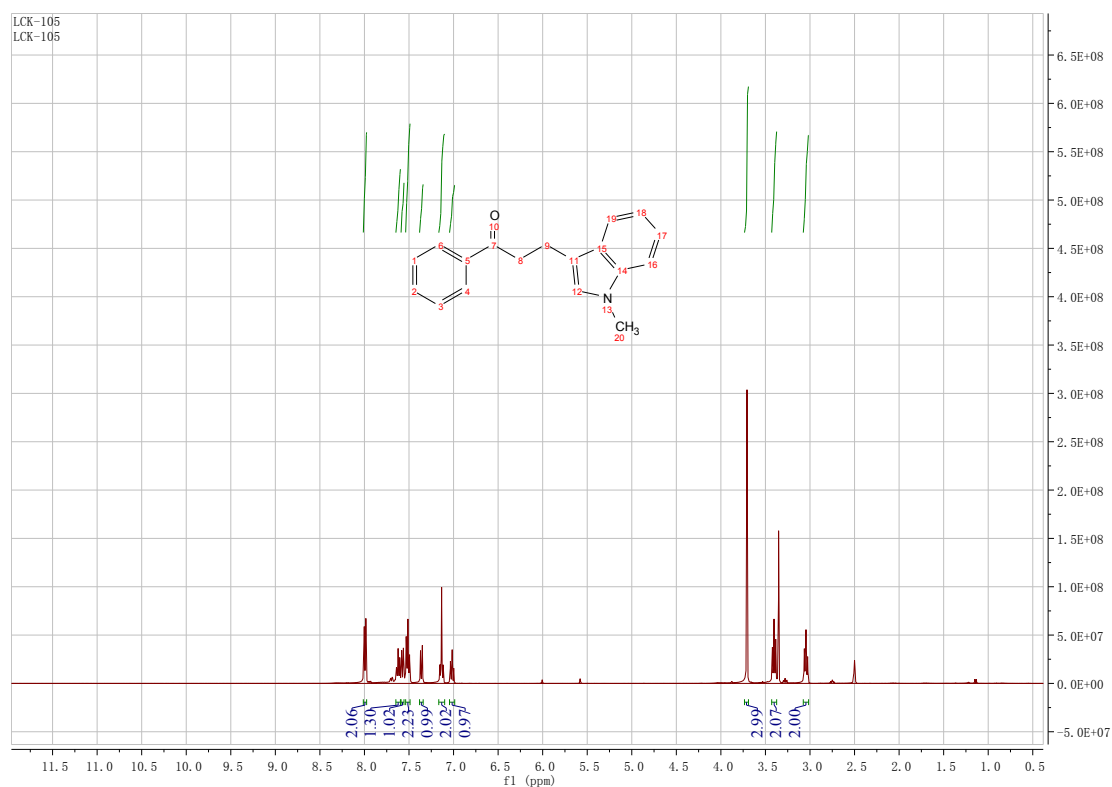

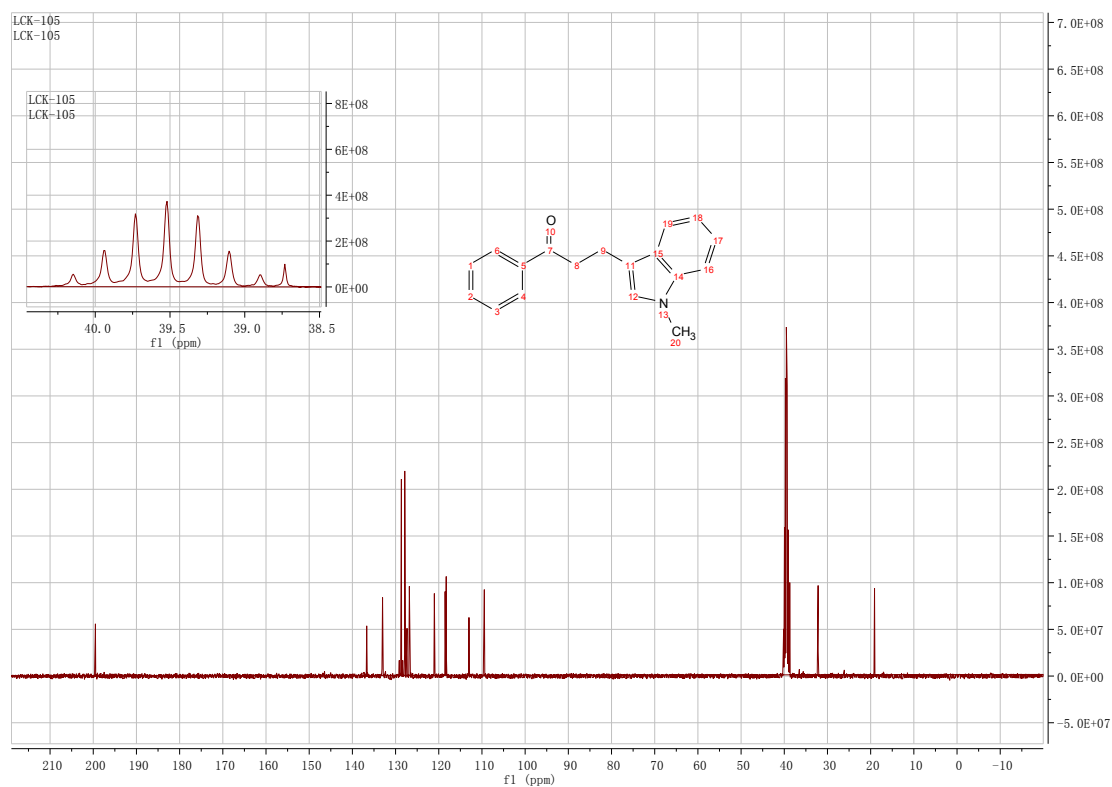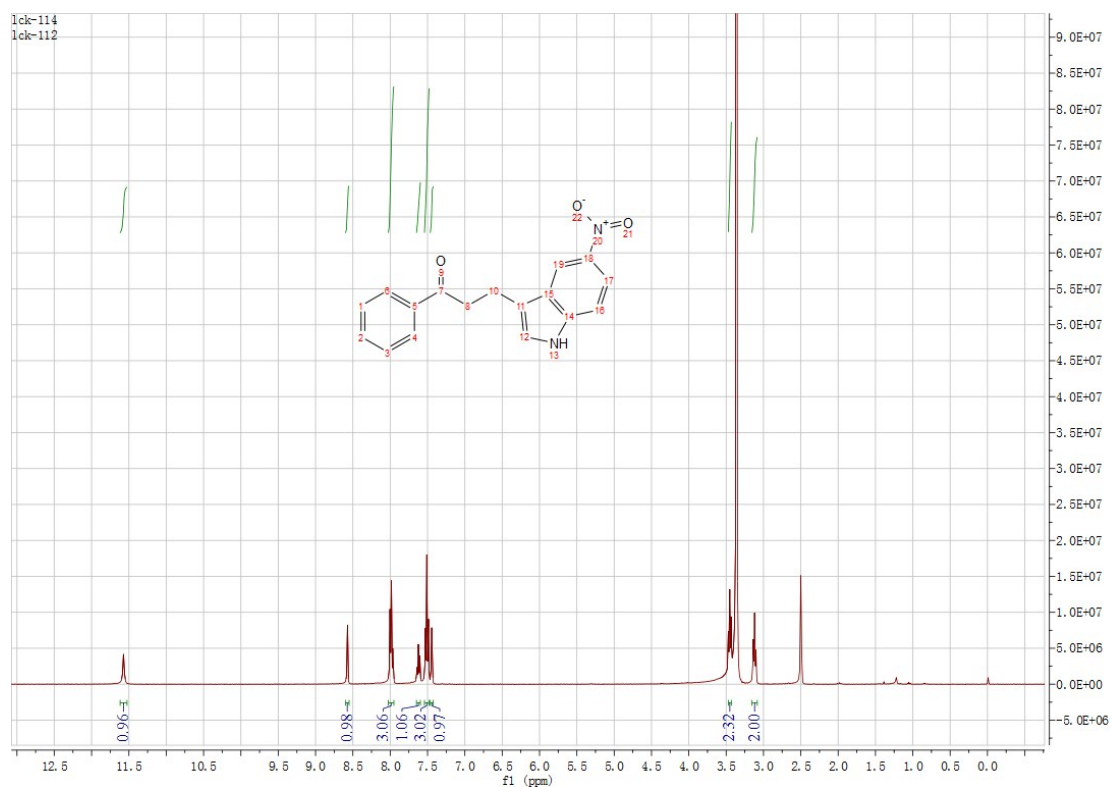

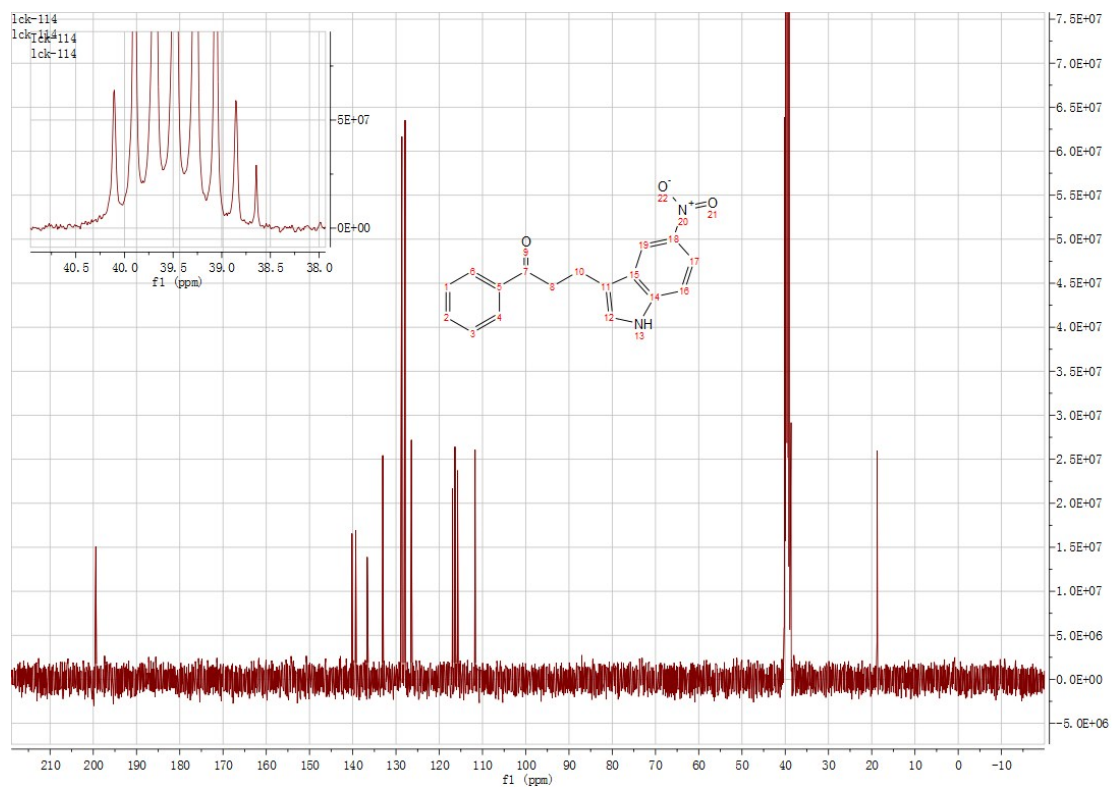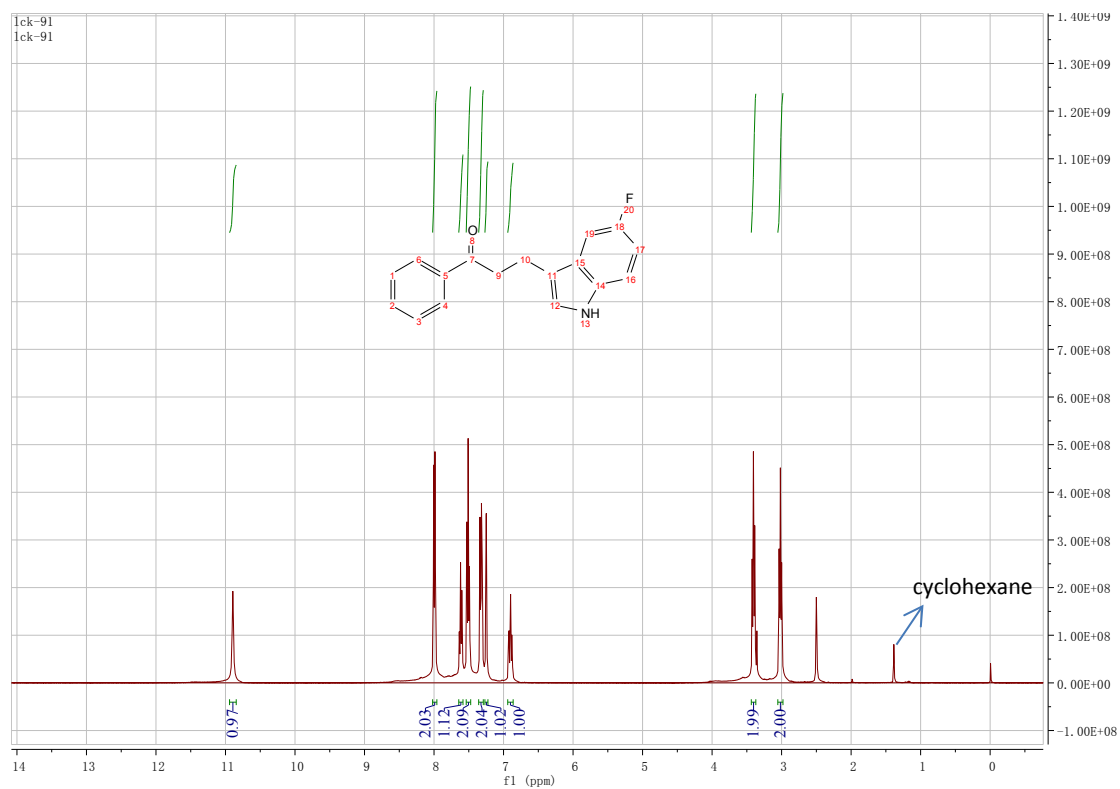

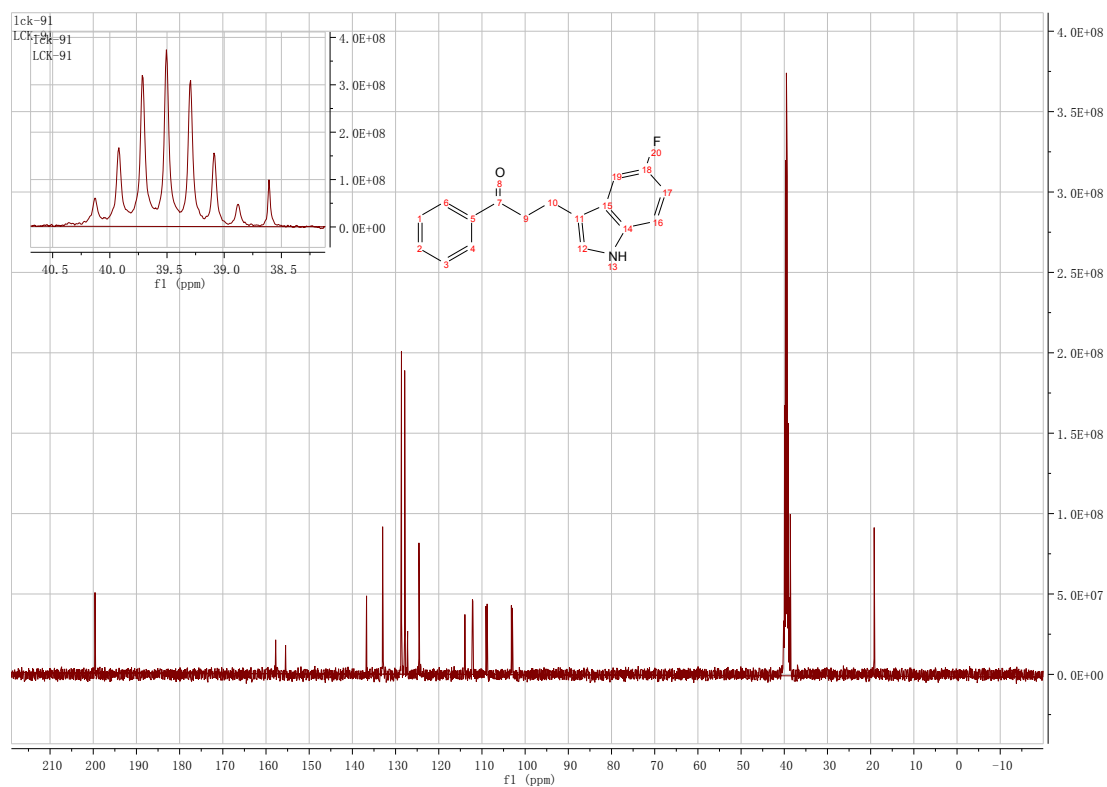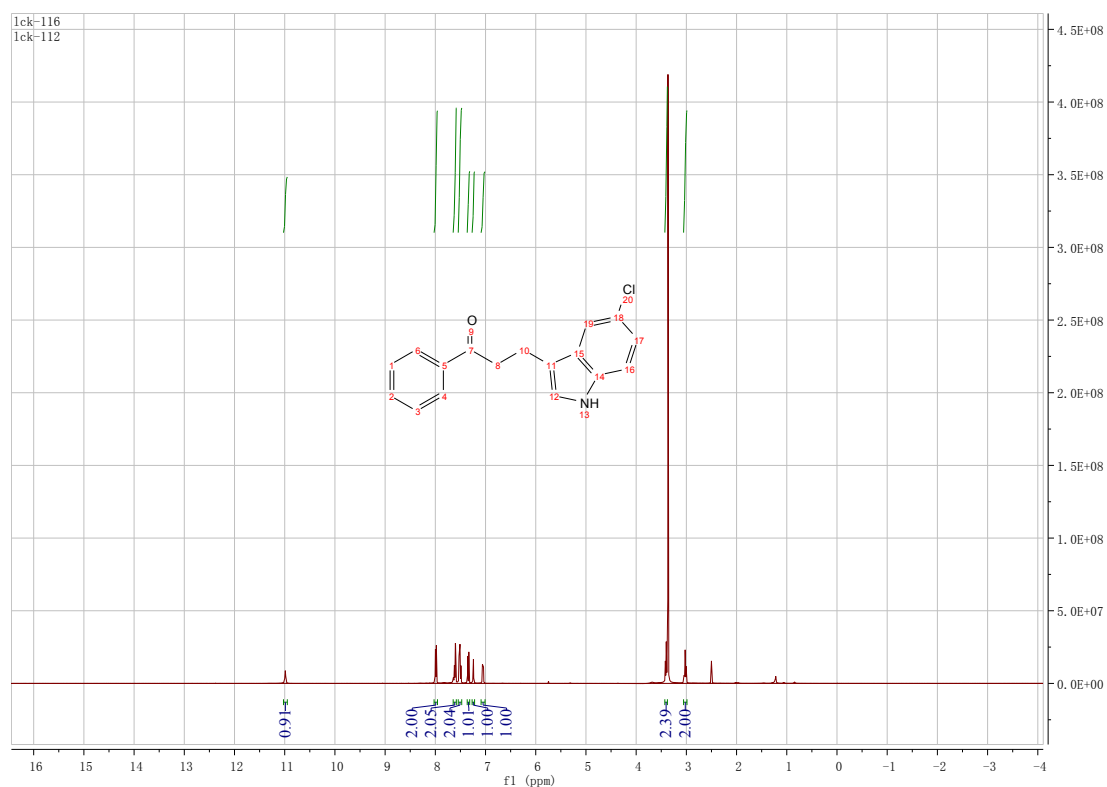

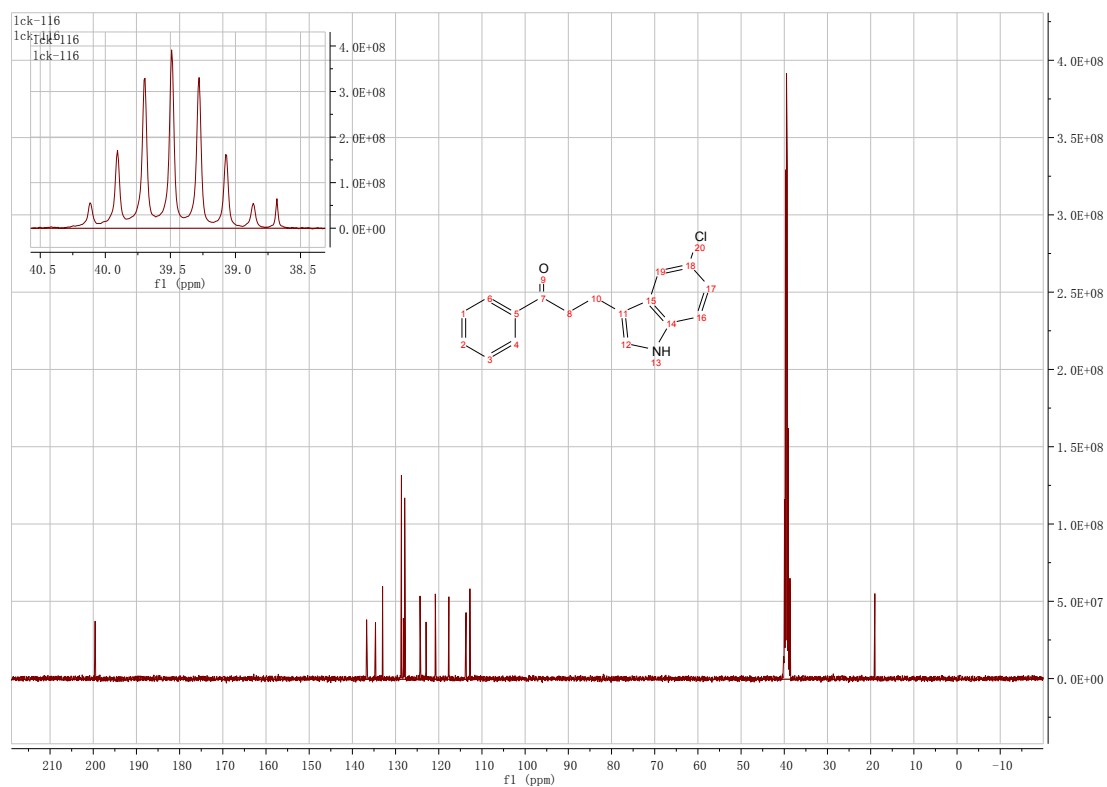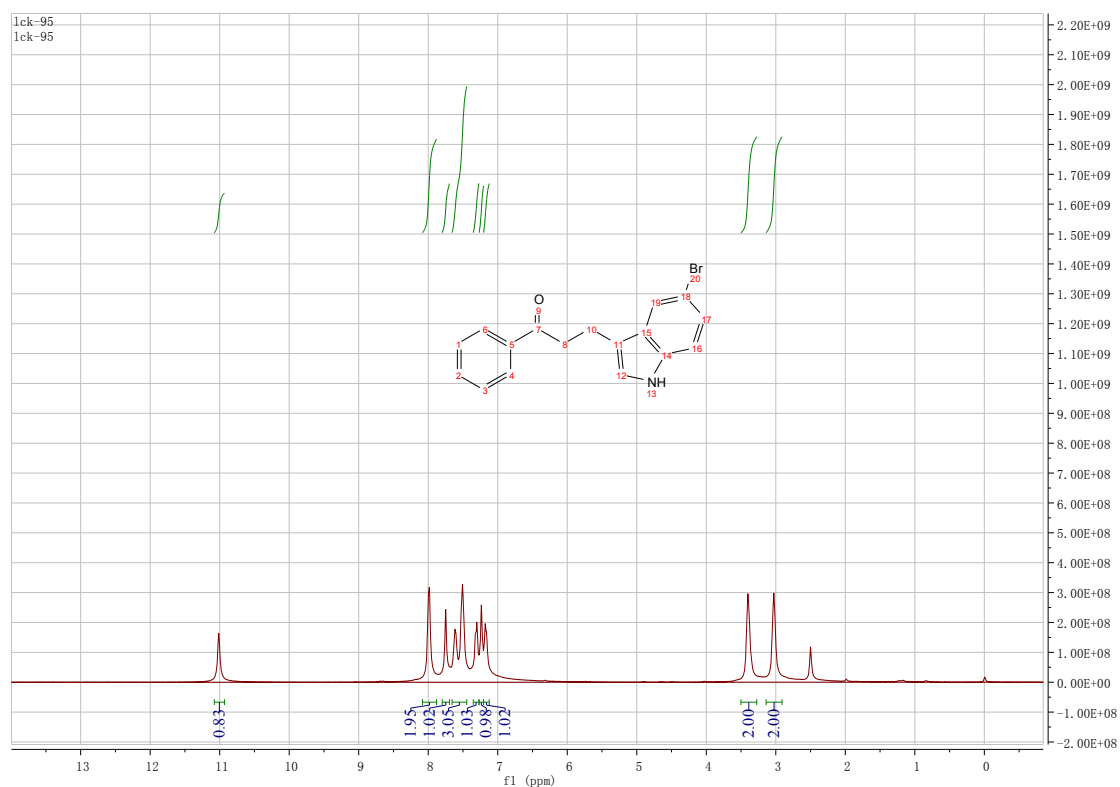

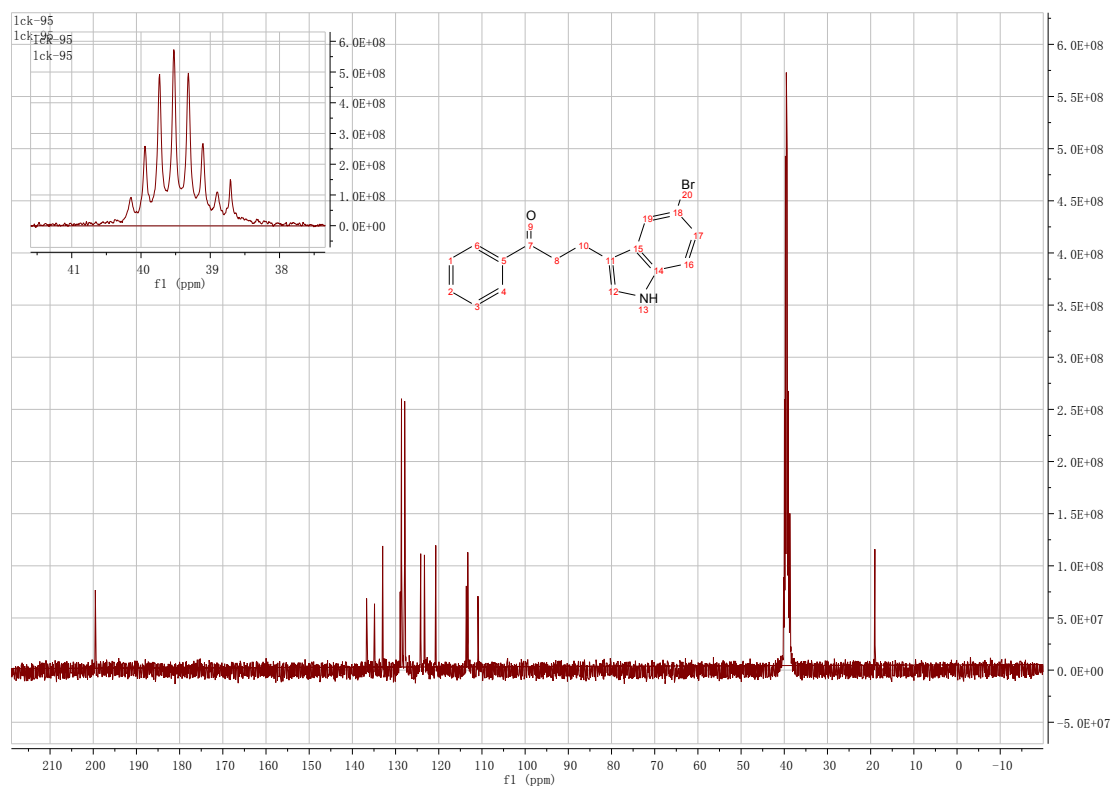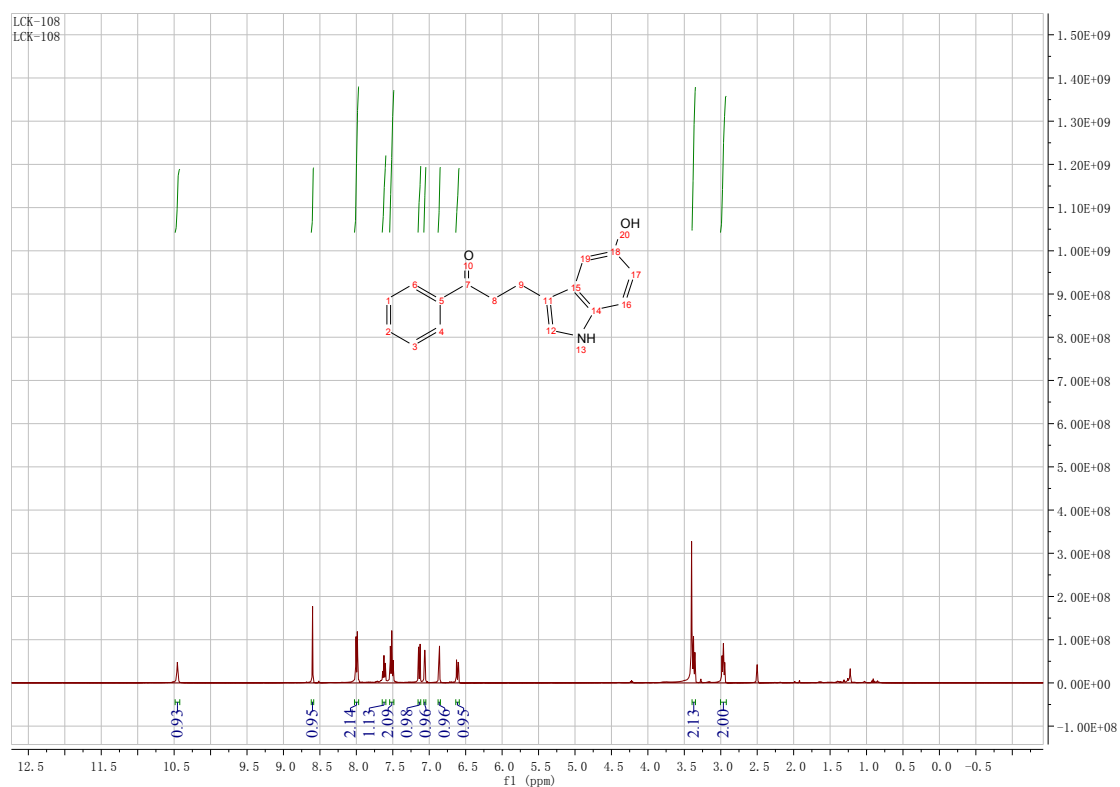

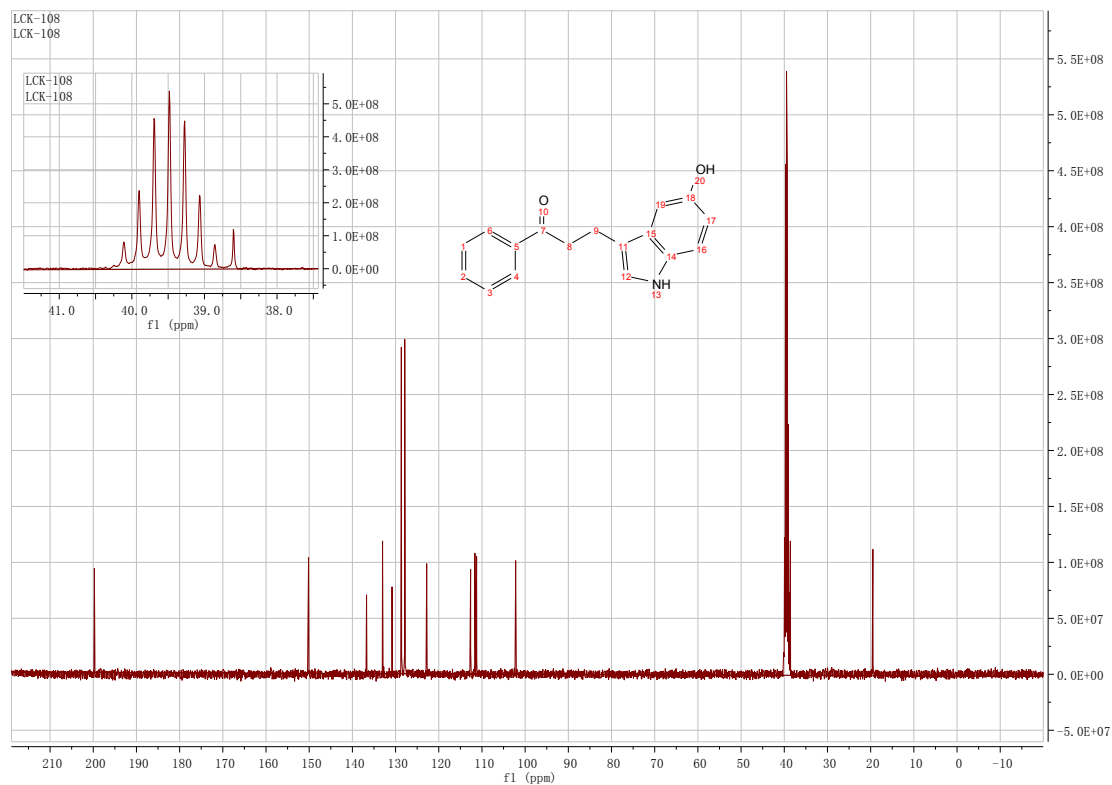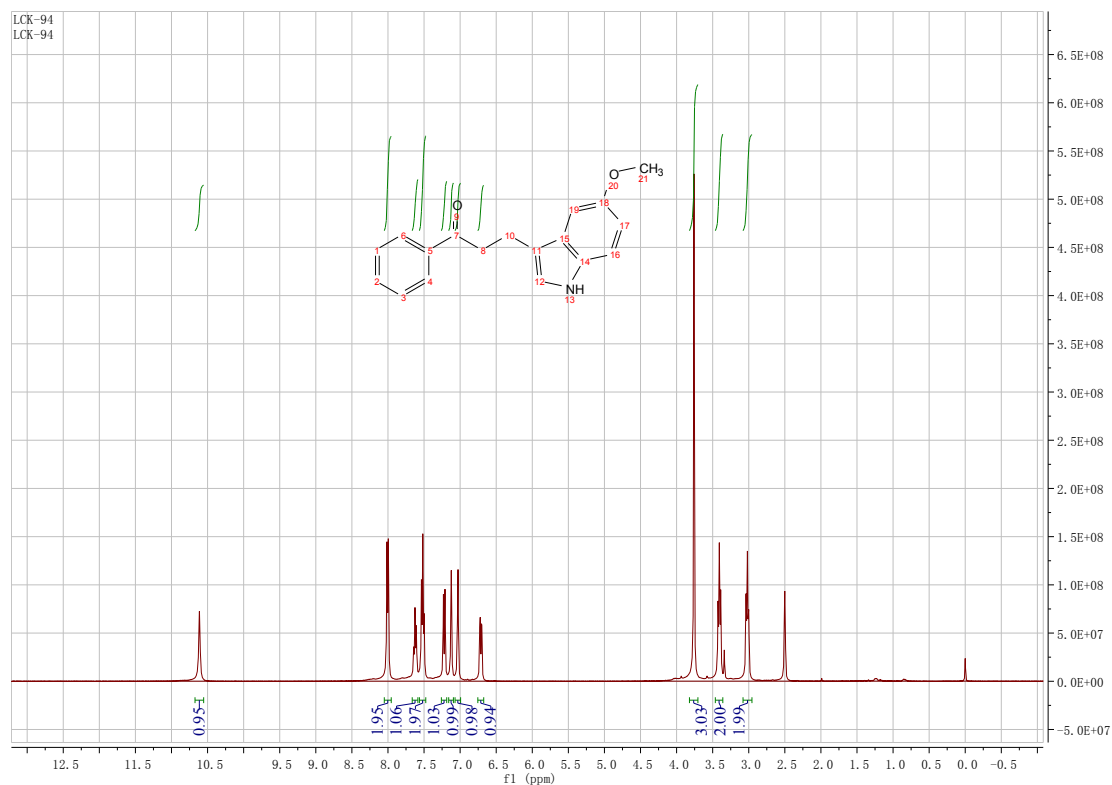

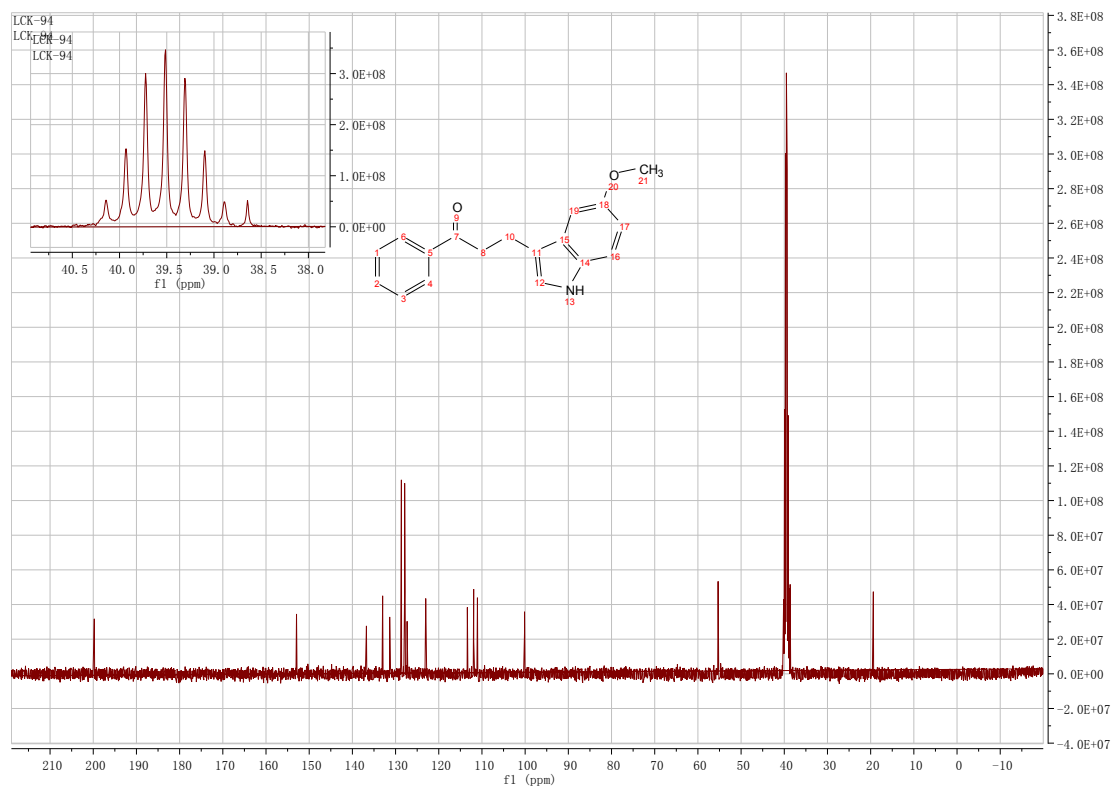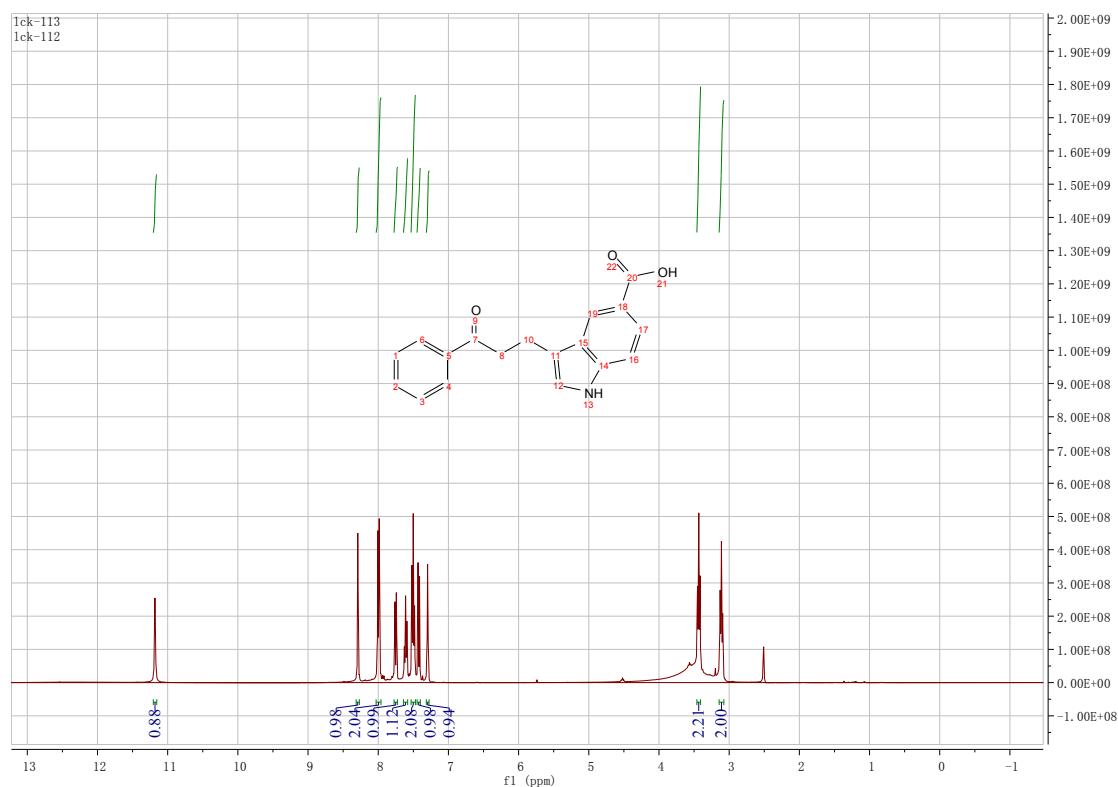

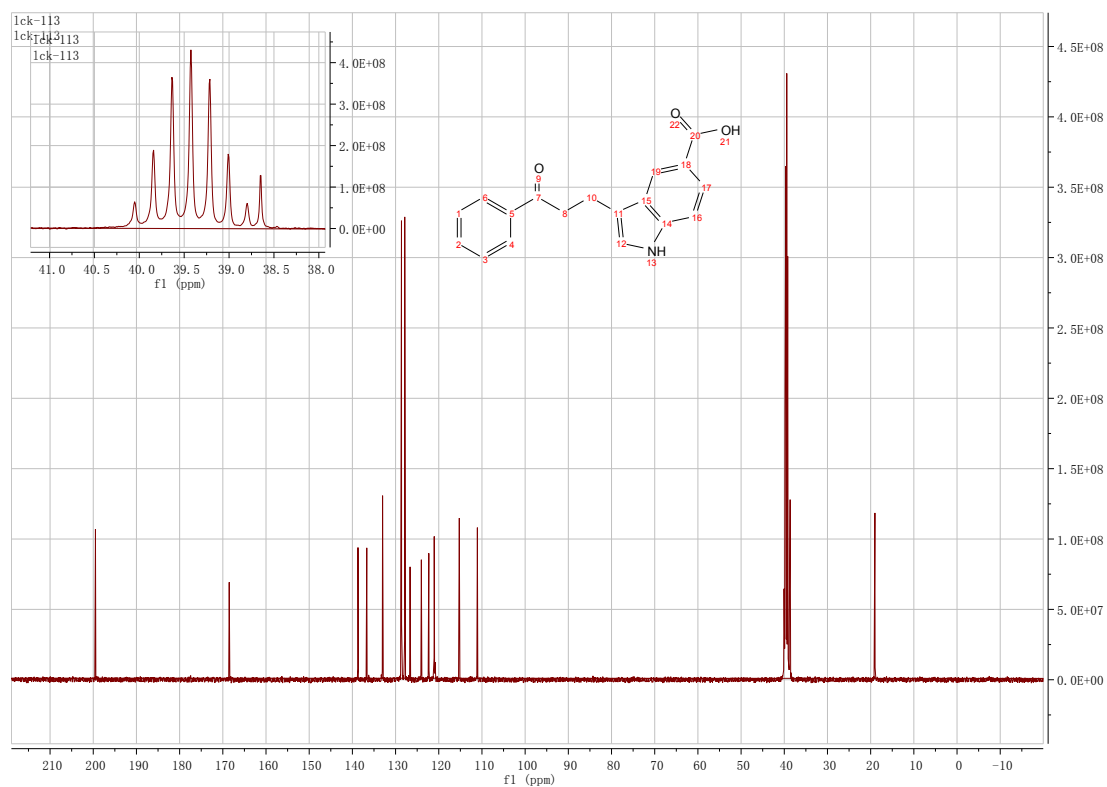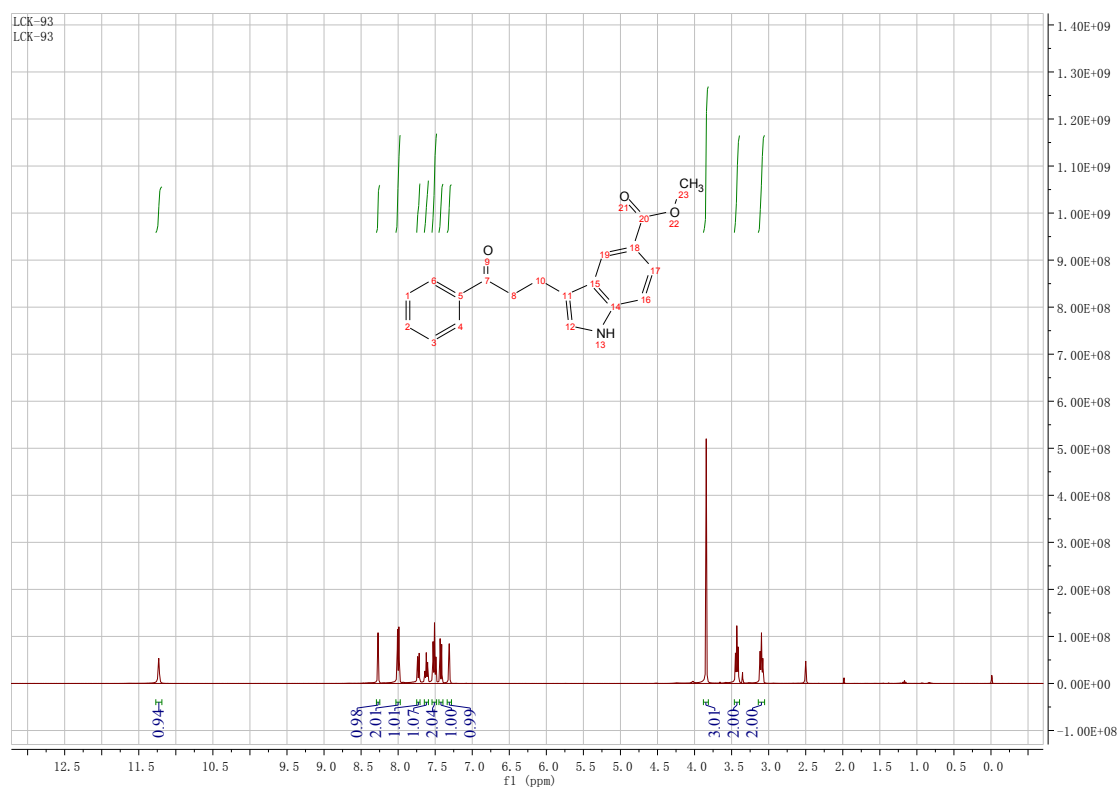

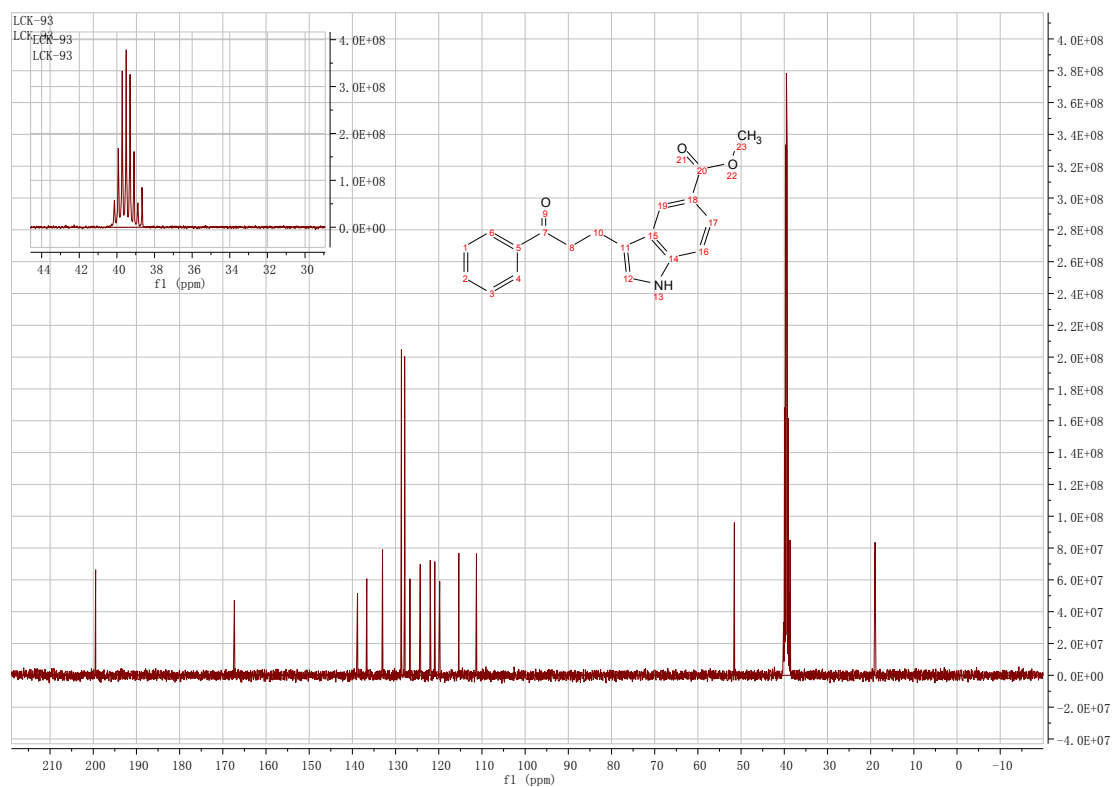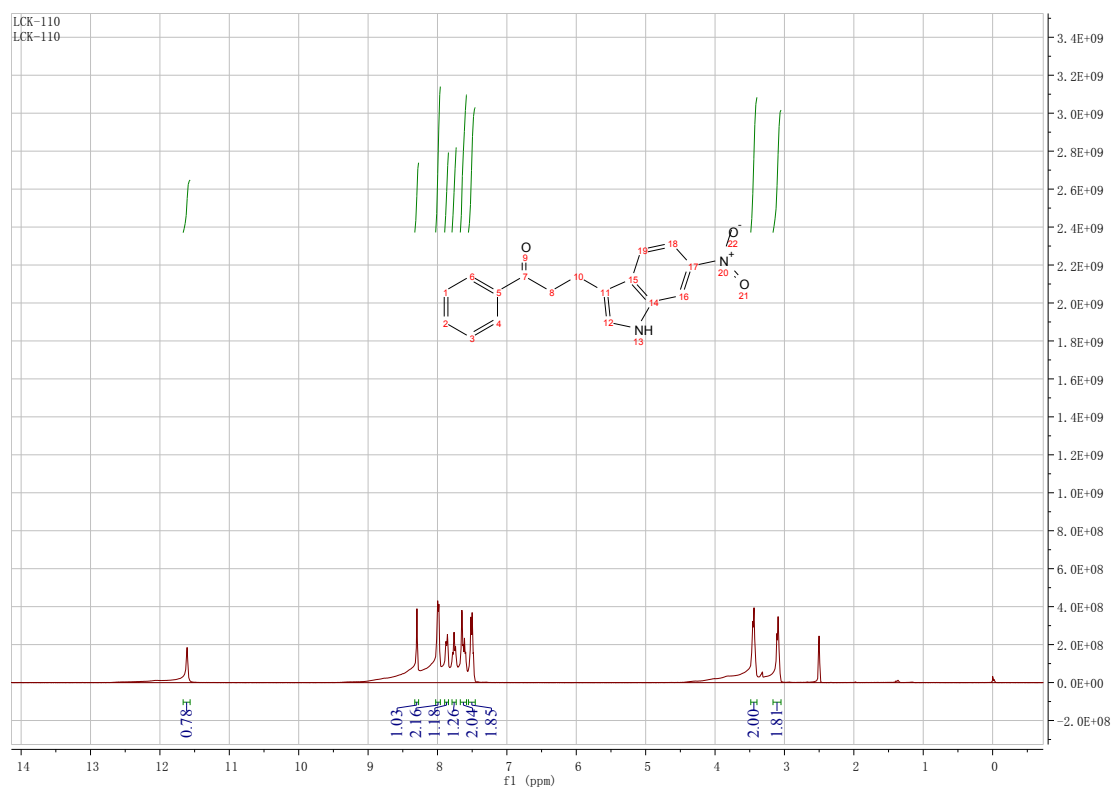

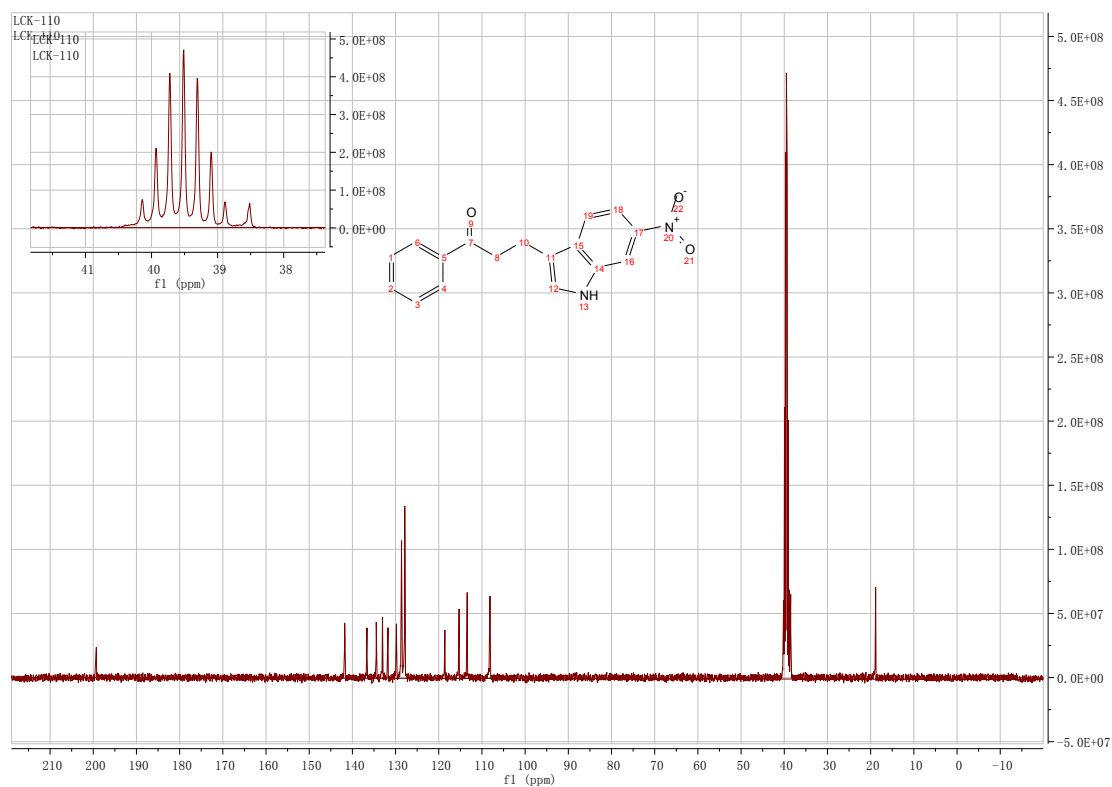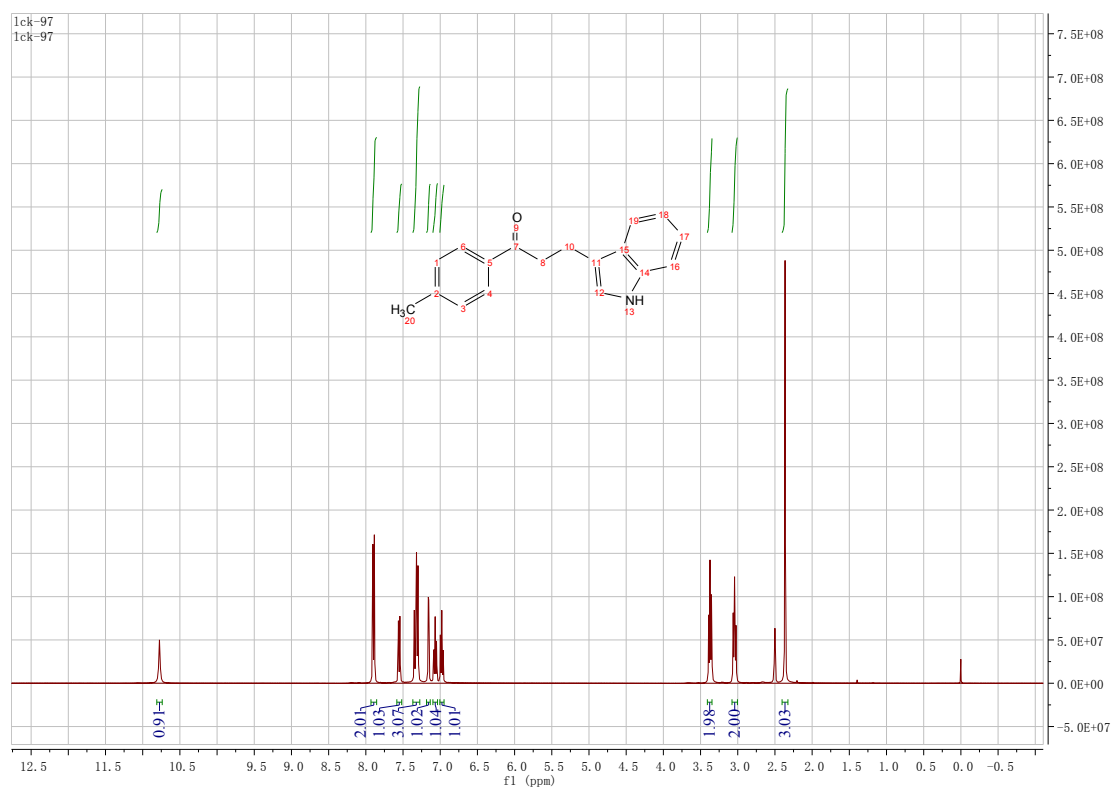

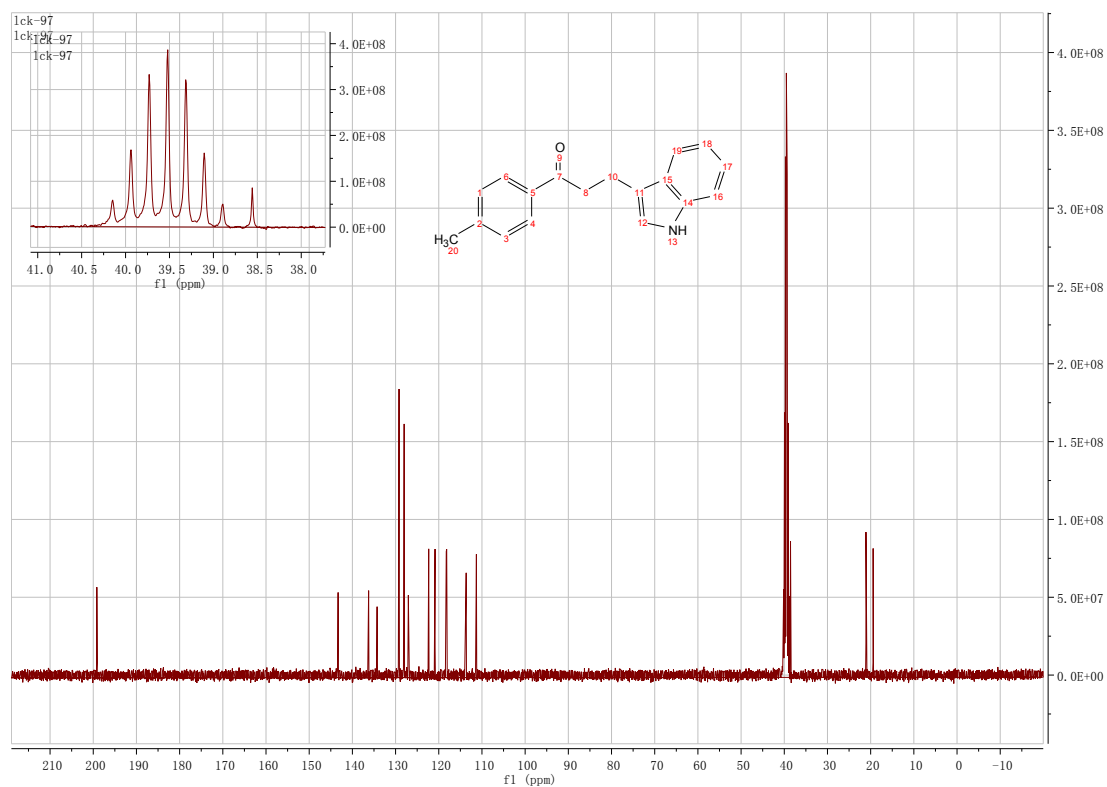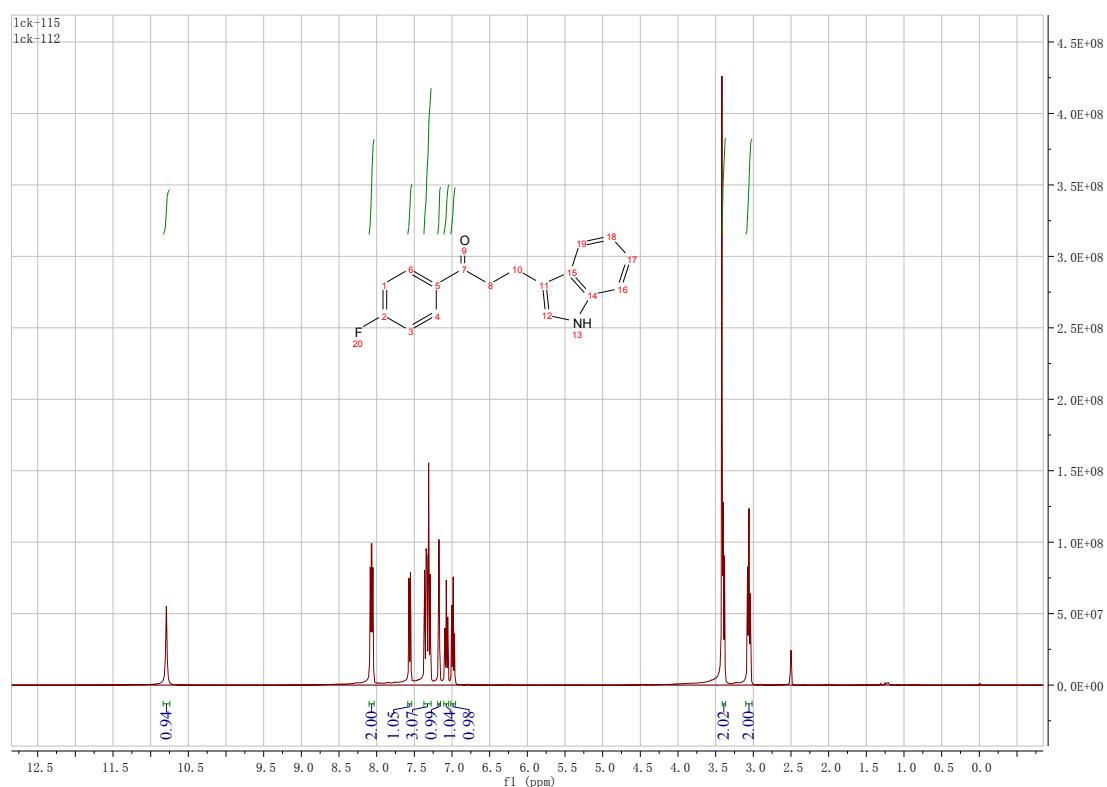

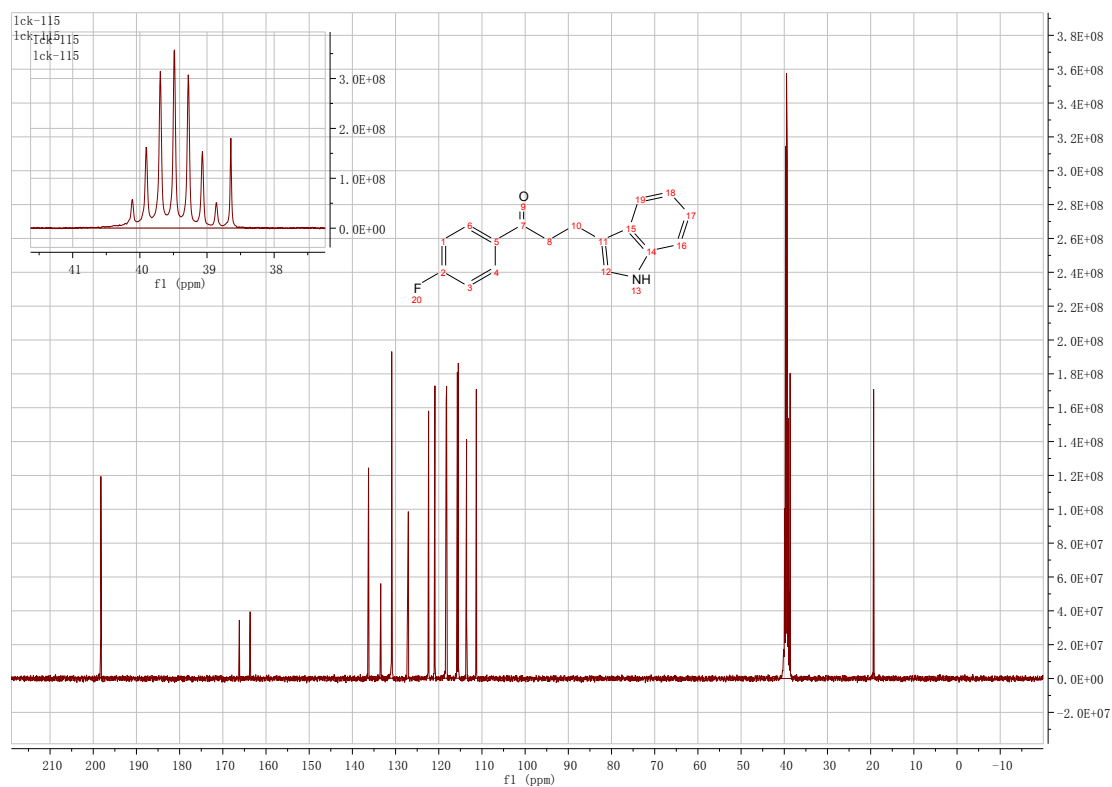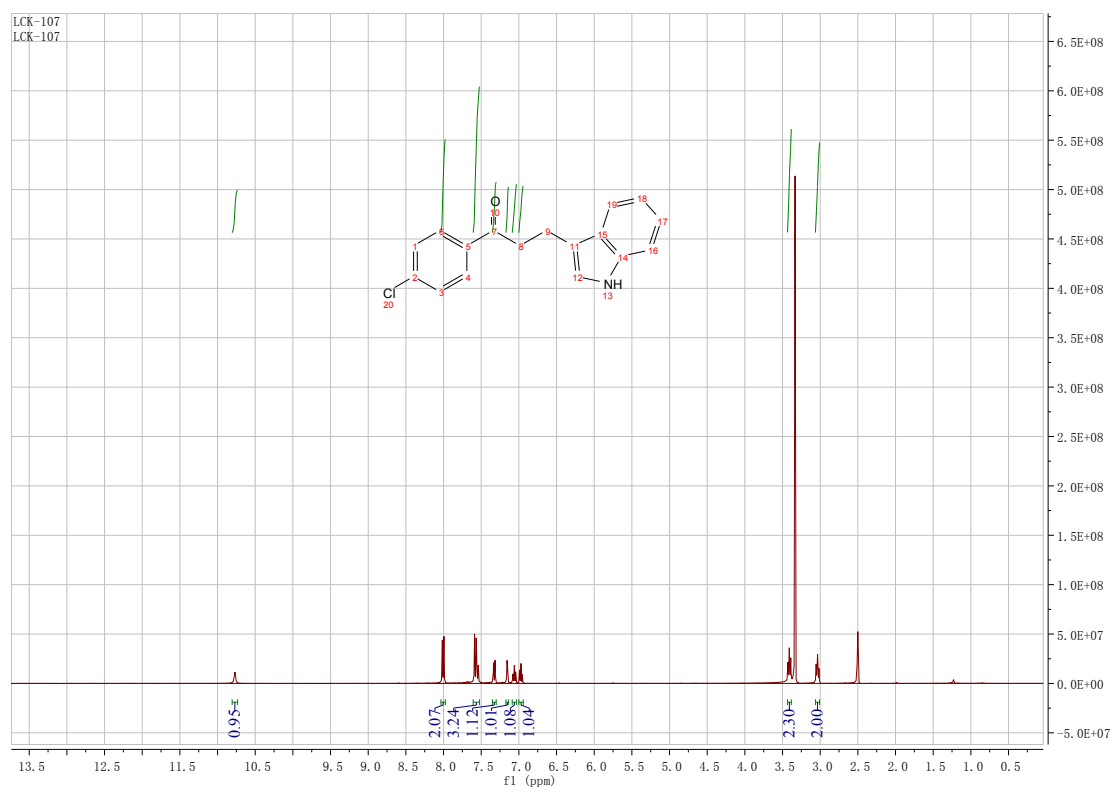

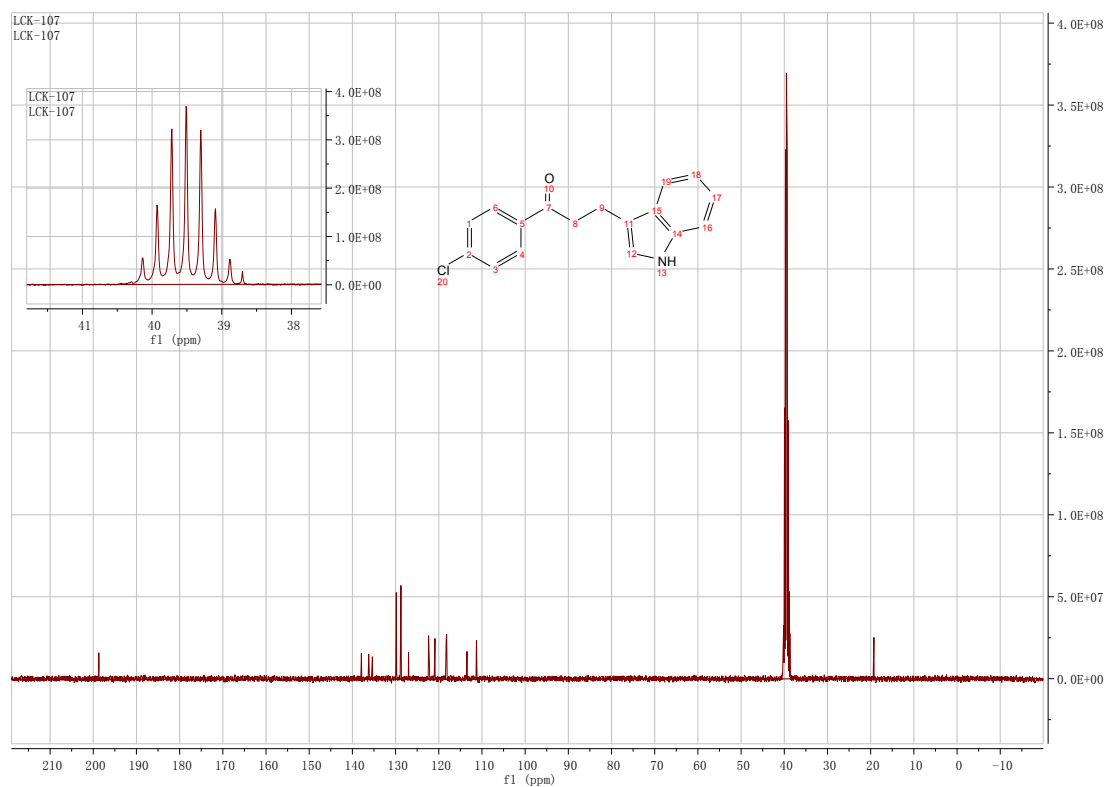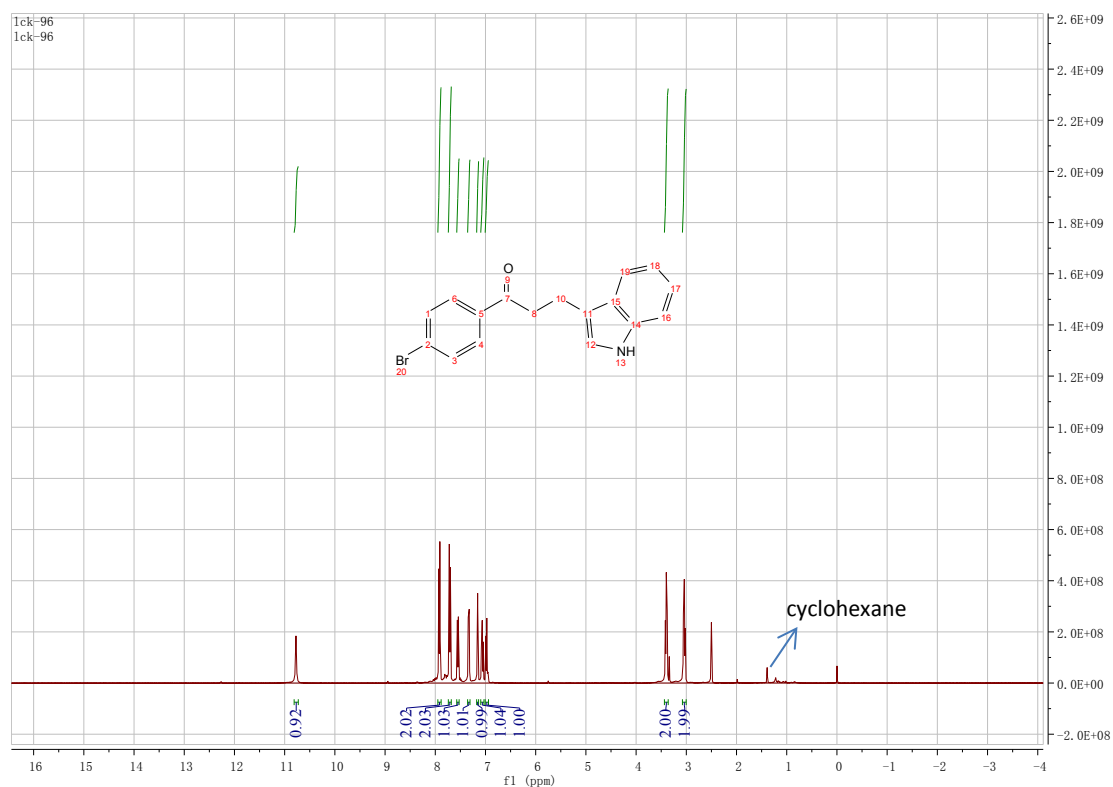

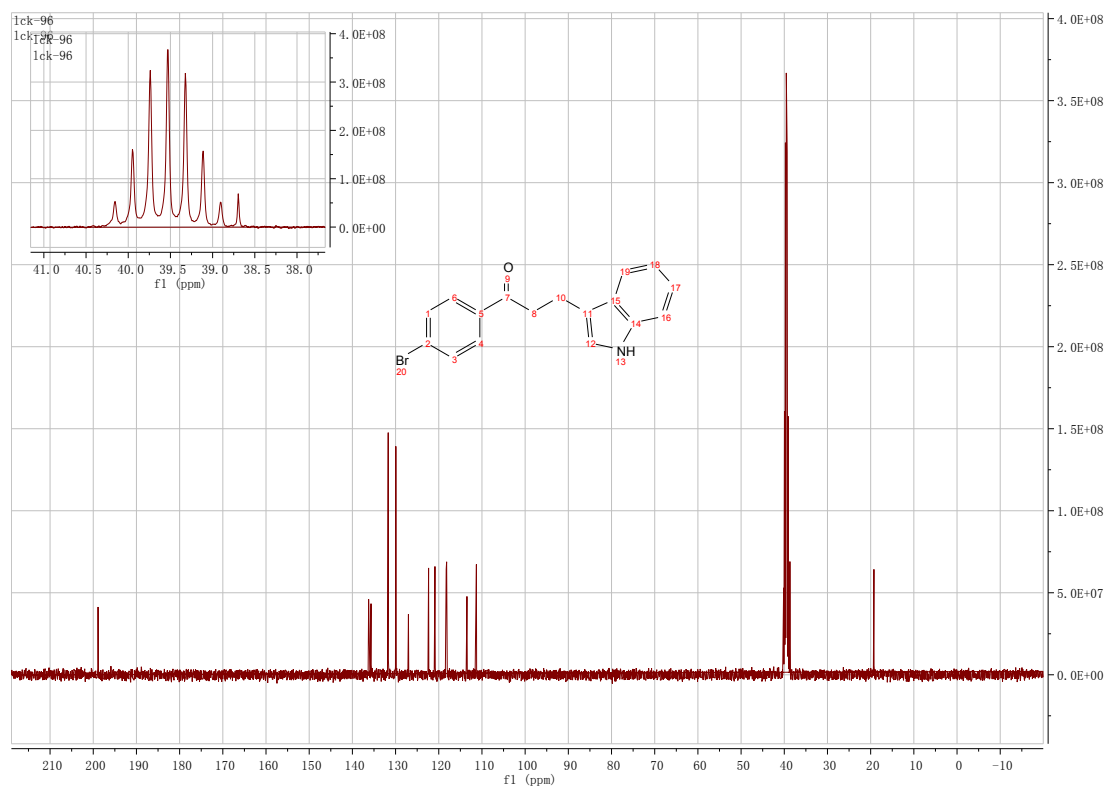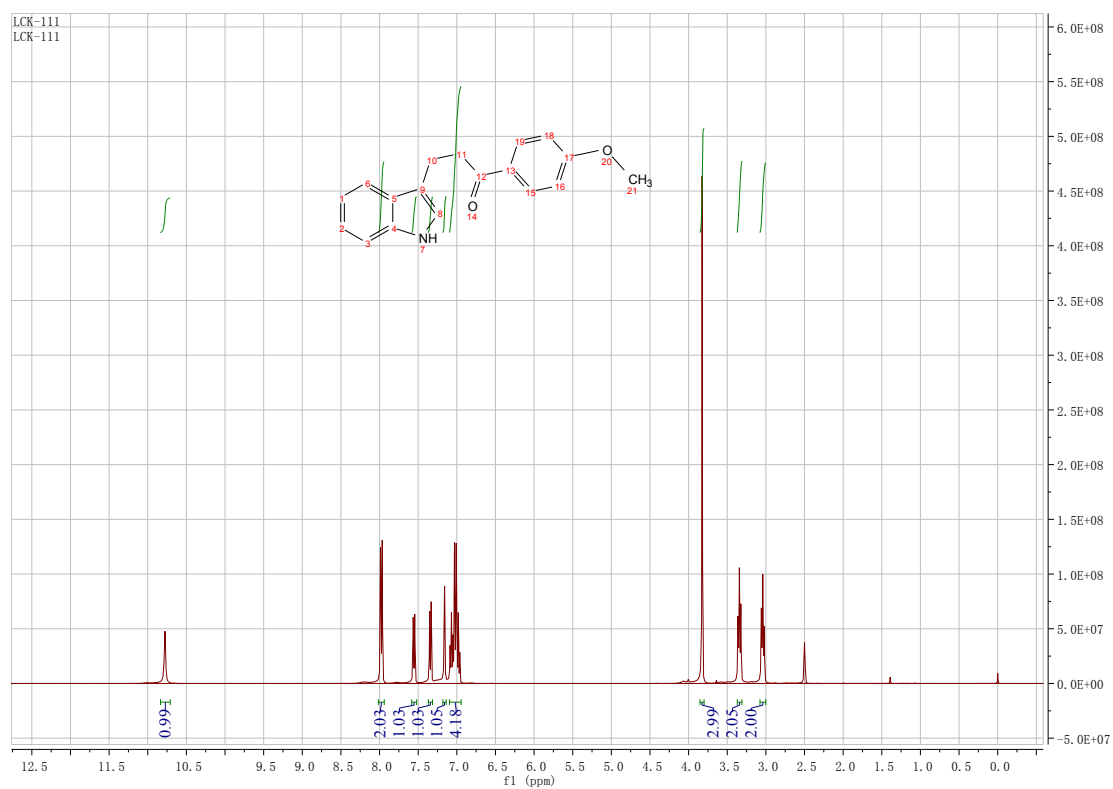

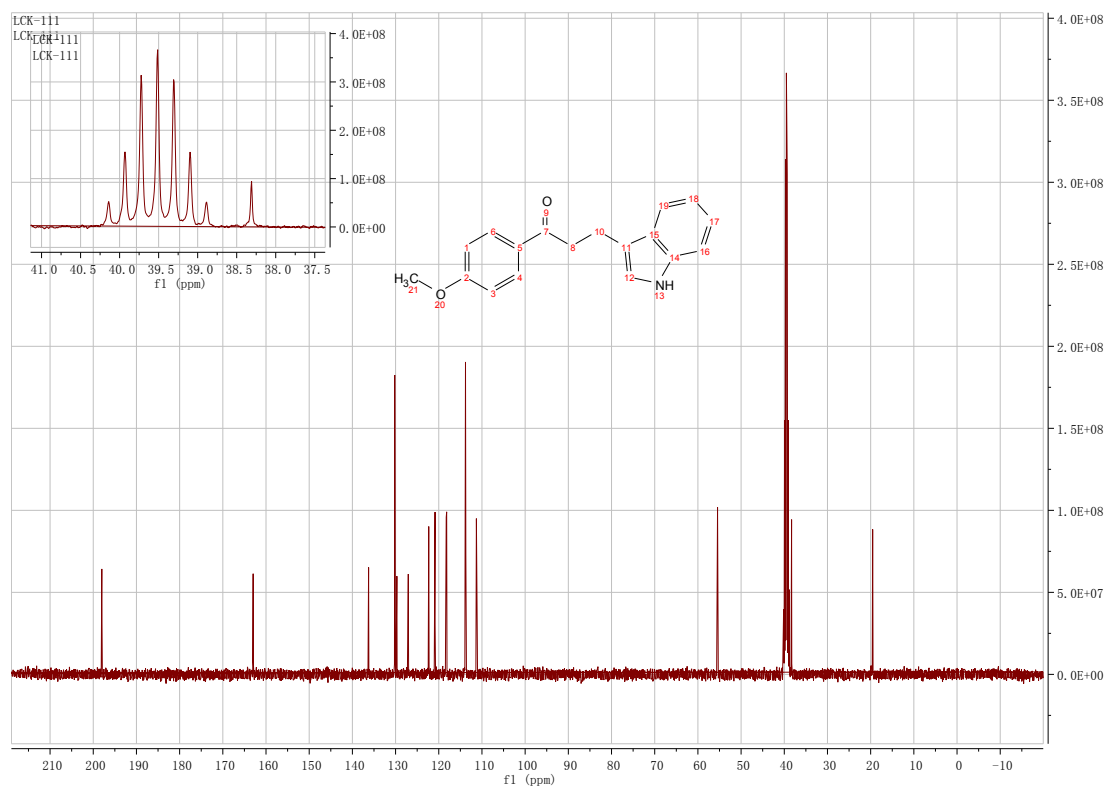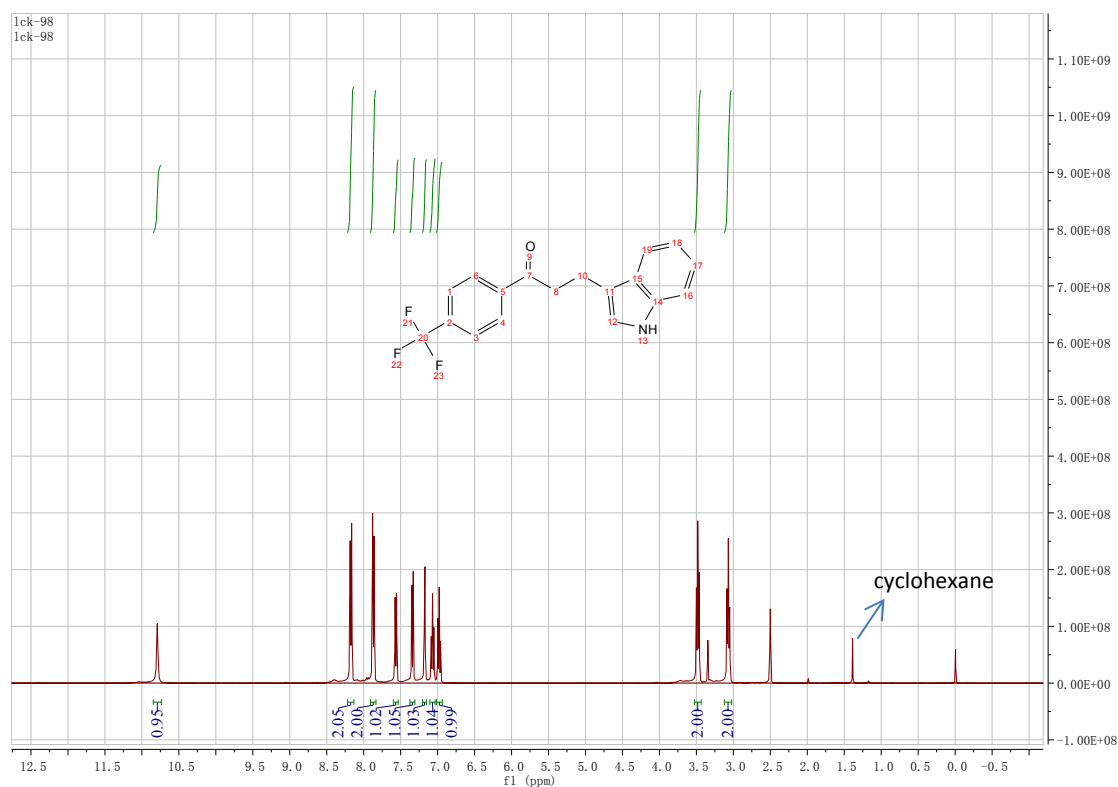

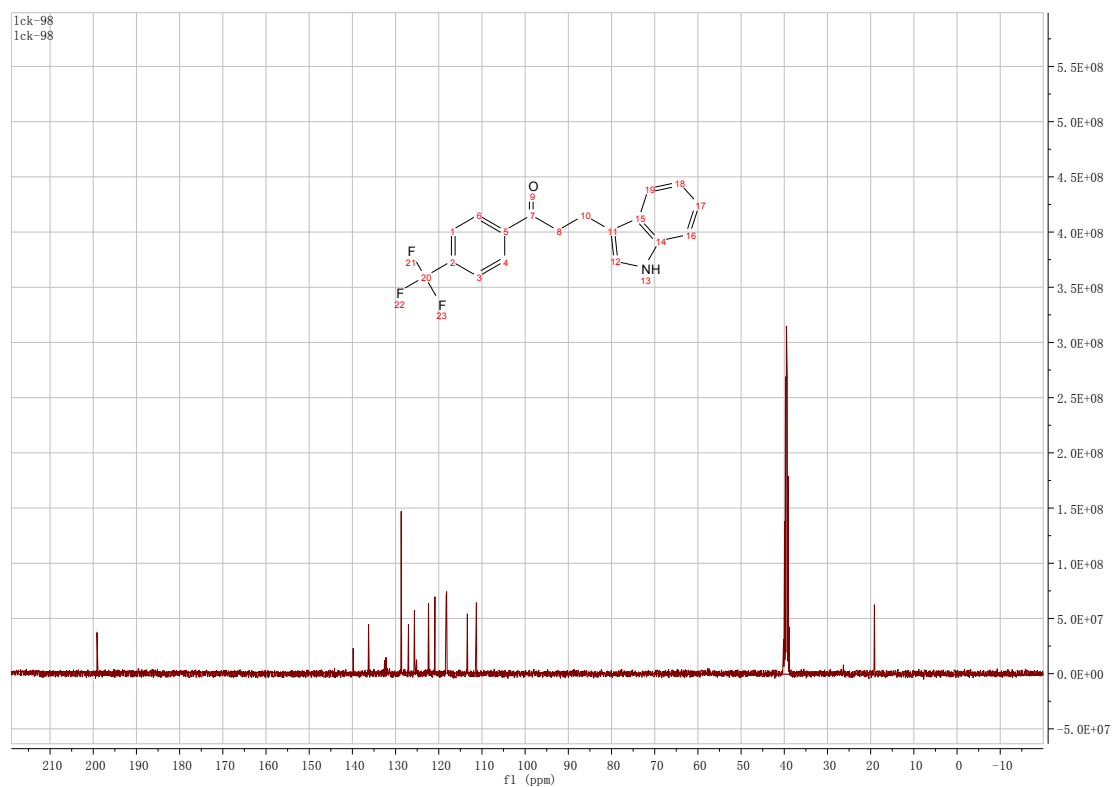

In this  $^{13}\text{C}$  NMR spectra,  $\alpha\text{-C}$  of carbonyl was wrapped in the solvent peak. To prove it,  $\text{CDCl}_3$  was used instead of  $\text{DMSO-D}_6$  shown in the following  $^{13}\text{C}$  NMR spectra. And, the missing the peak of  $\alpha\text{-C}$  of carbonyl was appeared obviously.

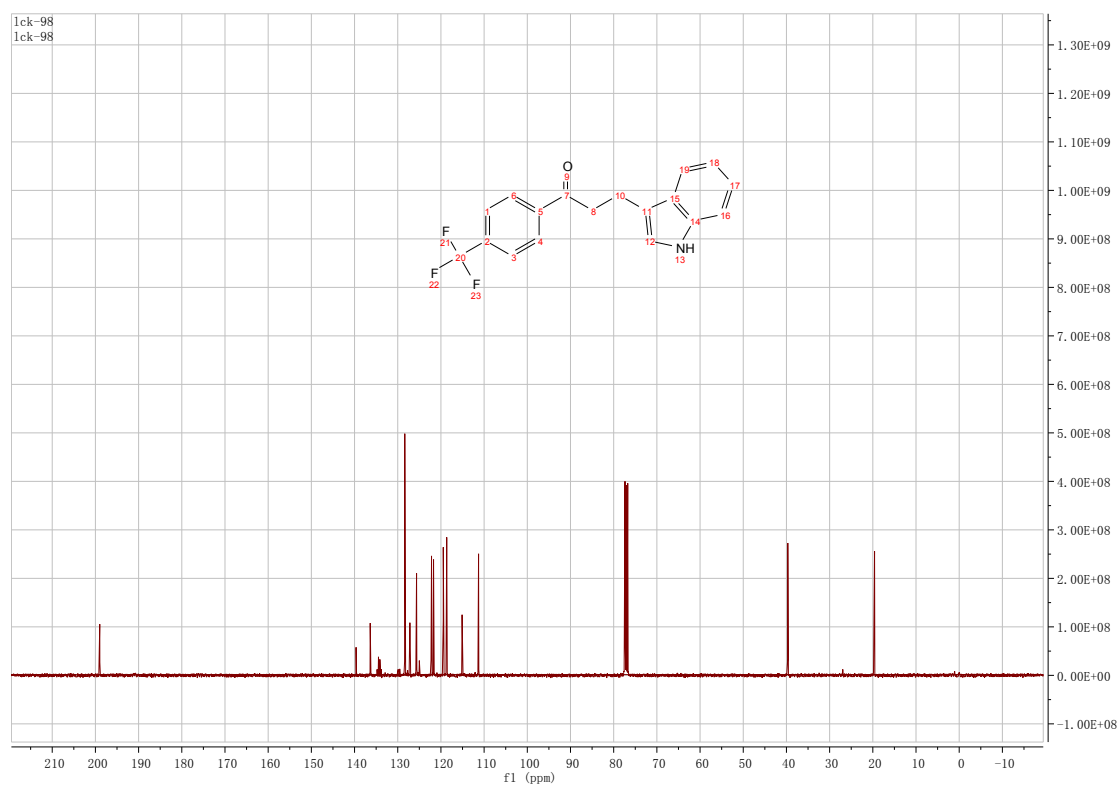

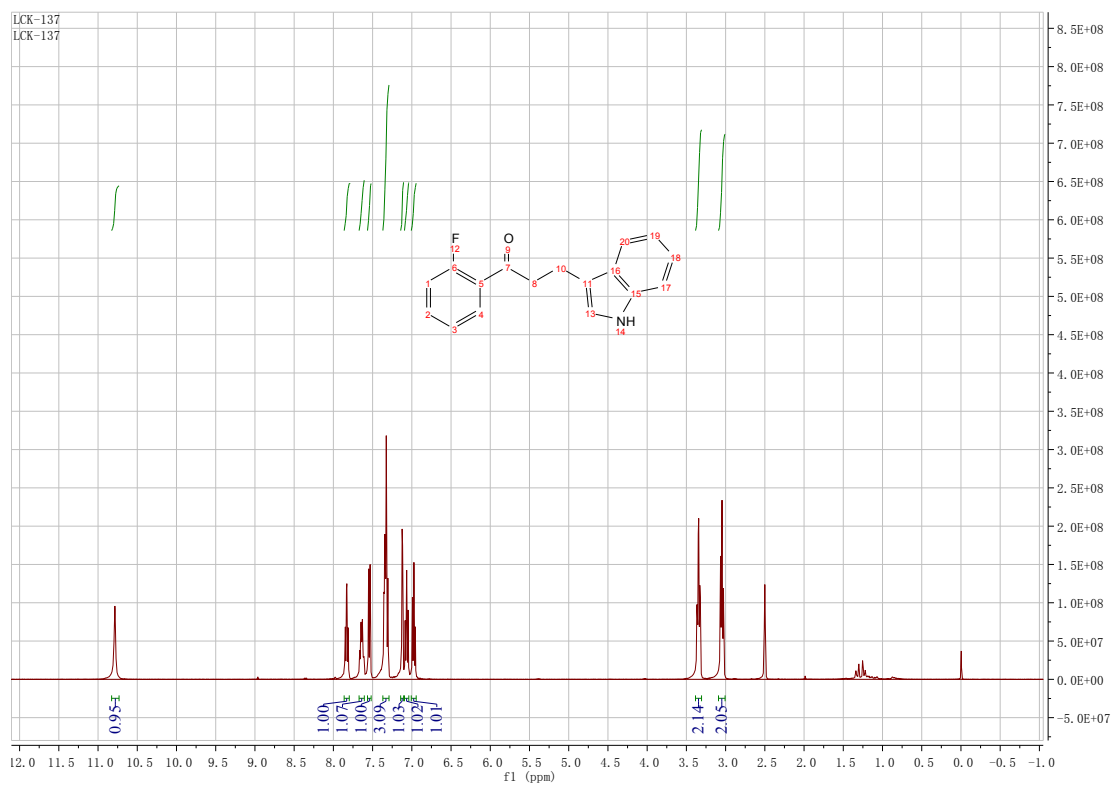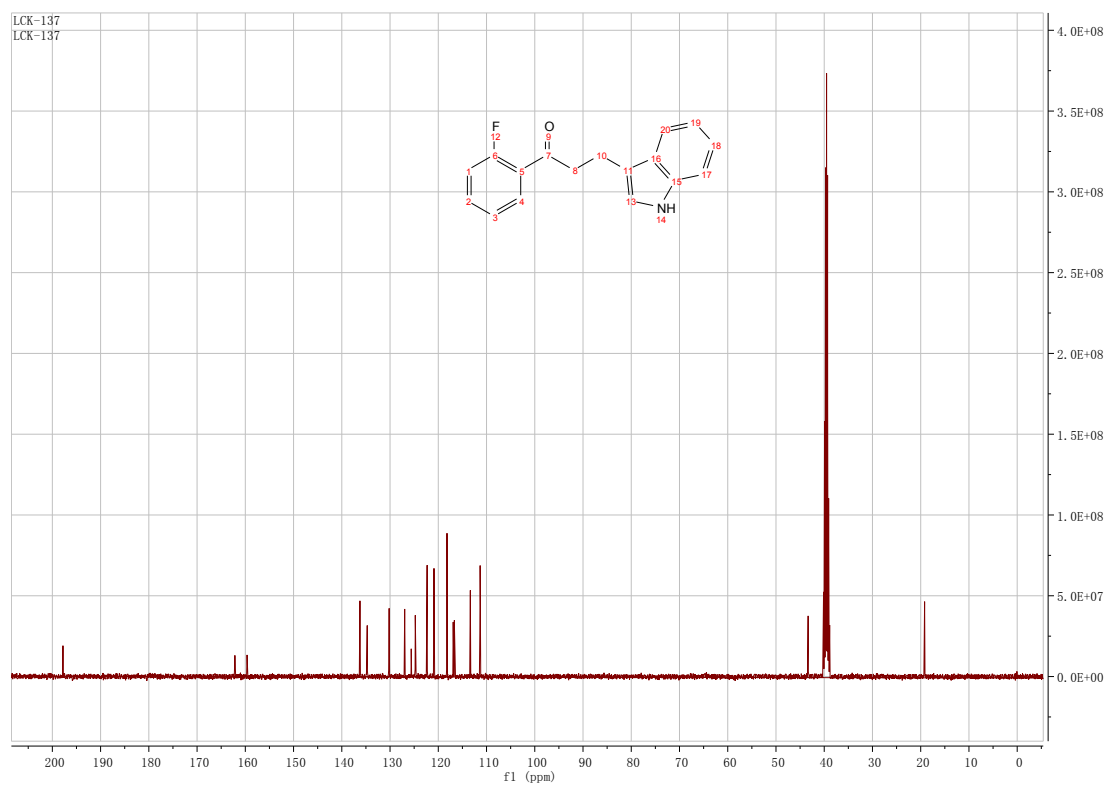

Supplement: c6ra19000f1.pdf [file c6ra19000f1.pdf]
